# Supplementary material
Source: Elsevier journal article supplement (https://rcastoragev2.blob.core.windows.net/2fd404ede2c99960a2fb366d5b19c9ee/mmc1.pdf)
Supplement: mmc1 [file mmc1.pdf]

## **Supplementary webappendix**

This webappendix formed part of the original submission and has been peer reviewed. We post it as supplied by the authors.

Supplement to: Connick P, Kolappan M, Crawley C, et al. Autologous mesenchymal stem cells for the treatment of secondary progressive multiple sclerosis: an open-label phase 2a proof-of-concept study. *Lancet Neurol* 2012; published online Jan 10. DOI:10.1016/S1474-4422(11)70305-2.

**Supplementary table 1: Existing studies using mesenchymal stem cells in multiple sclerosis**

| <b>Author</b>                  | <b>Description</b>                                                                                                                                                                                                                                     |
|--------------------------------|--------------------------------------------------------------------------------------------------------------------------------------------------------------------------------------------------------------------------------------------------------|
| Mohyeddin et al. <sup>19</sup> | Ten patients with RRMS were administered autologous MSCs intrathecally, and followed for a mean of 19 months by clinical and imaging assessment. No significant changes were seen in clinical or imaging outcomes.                                     |
| Yamout et al.                  | Ten patients with SPMS were administered autologous MSCs intrathecally, and followed for 12 months by clinical and imaging assessment. Clinical assessment suggested possible improvement but no significant change was seen on imaging outcomes.      |
| Karussis et al.                | Fifteen patients with SPMS were administered autologous MSCs both intrathecally and intravenously, and followed for 6 months by clinical and imaging assessments. No significant adverse events, or changes on clinical or imaging outcomes were seen. |

**Supplementary table 2: Assessment schedule**

| Time-line<br>Visit<br>number          | Pre-treatment |   |           |   |           |   |          |   | Post-treatment |         |         |         |          |    |          |    |
|---------------------------------------|---------------|---|-----------|---|-----------|---|----------|---|----------------|---------|---------|---------|----------|----|----------|----|
|                                       | -12 months    |   | -9 months |   | -6 months |   | 0 months |   | 1 week         | 2 weeks | 3 weeks | 4 weeks | 3 months |    | 6 months |    |
|                                       | 1             | 2 | 3         | 4 | 5         | 6 | 7        | 8 | 9              | 10      | 11      | 12      | 13       | 14 | 15       | 16 |
| EDSS                                  | X             |   | X         |   | X         |   | X        |   |                |         |         |         | X        |    | X        |    |
| MSFC                                  | X             |   | X         |   | X         |   | X        |   |                |         |         |         | X        |    | X        |    |
| MSIS-29                               | X             |   | X         |   | X         |   | X        |   |                |         |         |         | X        |    | X        |    |
| BDI-II                                | X             |   | X         |   | X         |   | X        |   |                |         |         |         | X        |    | X        |    |
| ACE-R                                 | X             |   | X         |   | X         |   | X        |   |                |         |         |         | X        |    | X        |    |
| VEP                                   | X             |   | X         |   | X         |   | X        |   |                |         |         |         | X        |    | X        |    |
| LogMAR<br>visual acuity               |               | X |           | X |           | X |          | X |                |         |         |         |          | X  |          | X  |
| Farnsworth<br>Munsell 100<br>Hue test |               | X |           | X |           | X |          | X |                |         |         |         |          | X  |          | X  |
| Humphrey<br>Visual<br>perimetry       |               | X |           | X |           | X |          | X |                |         |         |         |          | X  |          | X  |
| OCT                                   |               | X |           | X |           | X |          | X |                |         |         |         |          | X  |          | X  |
| MRI Optic<br>Nerve                    |               | X |           | X |           | X |          | X |                |         |         |         |          | X  |          | X  |
| MRI Brain                             |               | X |           | X |           | X |          | X |                |         |         |         |          | X  |          | X  |
| MRI Brain<br>(DTI<br>sequence)        |               |   |           | X |           |   |          |   |                |         |         |         |          |    |          | X  |
| Clinical<br>chemistry                 | X             |   |           |   |           |   | X        |   | X              | X       | X       | X       |          |    |          |    |
| FBC, ESR                              | X             |   |           |   |           |   | X        |   | X              | X       | X       | X       |          |    |          |    |
| Immuno-<br>globulins                  |               |   |           |   |           |   | X        |   | X              | X       | X       | X       |          |    |          |    |
| C3 & C4                               |               |   |           |   |           |   |          |   |                |         |         |         |          |    |          |    |
| T cell subsets                        |               |   |           |   |           |   | X        |   | X              | X       | X       | X       |          |    |          |    |
| Antibody<br>titres                    |               |   |           |   |           |   | X        |   | X              | X       | X       | X       |          |    |          |    |
| PT & APTT                             | X             |   |           |   |           |   | X        |   | X              | X       | X       | X       |          |    |          |    |

EDSS = expanded disability status scale; MSFC = multiple sclerosis functional composite; BDI-II = Beck depression inventory II; ACE-R = Addenbrooke's cognitive examination (revised); VEP = visual evoked potential; OCT = optical coherence tomography; DTI = diffusion tensor imaging; Clinical chemistry = serum urea and

electrolytes, liver function tests, serum calcium, glucose, & thyroid function; FBC = full blood count; ESR = erythrocyte sedimentation rate; Immunoglobulins = serum IgG, IgA, & IgM; C3 & C4 = serum complement component 3 and serum complement component 4; T-cell subsets = differential count for CD3, CD4, CD8, CD19, & CD56; Antibody titres = serum titres for Haemophilus influenzae type-b IgG, tetanus IgG, rubella IgG, varicella zoster virus IgG, mumps IgG, measles IgG, and pneumococcal IgG for serotypes 1, 3, 4, 5, 6A, 6B, 7F, 9V, 14, 18C, 19A, 19F, & 23F; PT = prothrombin time; APTT = accelerated partial thromboplastin time.

**Supplementary table 3: Change in key visual outcomes by individual patients**

| Subject ID | Optic nerve ID | Outcome Measure (units)             | Pre-treatment |           |           |          | Post-treatment |           |
|------------|----------------|-------------------------------------|---------------|-----------|-----------|----------|----------------|-----------|
|            |                |                                     | -12 months    | -9 months | -6 months | 0 months | +3 months      | +6 months |
| A          | 1              | Visual acuity (LogMAR)              | -0.14         | 0.1       | 0.04      | -0.06    | 0              | -0.06     |
|            |                | 25% contrast acuity (logMAR)        | 0.1           | 0.24      | 0.22      | 0        | 0.02           | 0.06      |
|            |                | 5% contrast acuity (logMAR)         | 0.6           | 0.56      | 0.48      | 0.4      | 0.4            | 0.56      |
|            |                | 1.25% contrast acuity (logMAR)      | 0.76          | 0.76      | 0.76      | 0.76     | 0.7            | 0.78      |
|            |                | Full field VER latency (ms)         | 138           | 138       | 142.8     | 140      | 139            | 146.1     |
|            |                | Full field VER amplitude (μV)       | 9             | 9         | 8         | 6        | 7              | 4.8       |
|            |                | Optic nerve area (mm <sup>2</sup> ) | 9.55          | 9.58      | 9.025     | 8.6      | 10.93          | 9.78      |
|            | 2              | Visual acuity (LogMAR)              | -0.1          | 0         | 0         | -0.06    | -0.06          | -0.06     |
|            |                | 25% contrast acuity (logMAR)        | 0             | 0.06      | 0.1       | 0.04     | 0              | 0.04      |
|            |                | 5% contrast acuity (logMAR)         | 0.3           | 0.4       | 0.3       | 0.28     | 0.18           | 0.28      |
|            |                | 1.25% contrast acuity (logMAR)      | 0.54          | 0.74      | 0.6       | 0.56     | 0.5            | 0.66      |
|            |                | Full field VER latency (ms)         | 120           | 120       | 124       | 118      | 121            | 123       |
|            |                | Full field VER amplitude (μV)       | 8             | 8         | 5.8       | 2        | 9              | 6.1       |
|            |                | Optic nerve area (mm <sup>2</sup> ) | 10.3          | 10.26     | 10.25     | 10.9     | 12.15          | 11.53     |
| B          | 3              | Visual acuity (LogMAR)              | 0.08          | 0.64      | 0.22      | 0.54     | 0.16           | 0.04      |
|            |                | 25% contrast acuity (logMAR)        | 0.32          | 0.68      | 0.3       | 0.58     | 0.2            | 0.2       |
|            |                | 5% contrast acuity (logMAR)         | 0.7           | 1.4       | 0.86      | 1.4      | 0.54           | 0.6       |
|            |                | 1.25% contrast acuity (logMAR)      | 1.4           | 1.7       | 1.7       | 1.7      | 1.3            | 1.38      |
|            |                | Full field VER latency (ms)         | 133           | 135       | -         | NR       | 136.5          | 138.9     |
|            |                | Full field VER amplitude (μV)       | 4             | 6         | -         | NR       | 3.6            | 3.1       |
|            |                | Optic nerve area (mm <sup>2</sup> ) | 10.74         | 8.05      | 8.05      | -        | 8.2            | 7.825     |
|            | 4              | Visual acuity (LogMAR)              | 0.1           | 0.2       | 0.2       | 0.2      | 0.08           | 0         |
|            |                | 25% contrast acuity (logMAR)        | 0.3           | 0.46      | 0.36      | 0.3      | 0.28           | 0.08      |
|            |                | 5% contrast acuity (logMAR)         | 0.66          | 0.74      | 0.8       | 0.7      | 0.64           | 0.56      |
|            |                | 1.25% contrast acuity (logMAR)      | 1.4           | 1.7       | 1.7       | 1.7      | 1.24           | 1.28      |
|            |                | Full field VER latency (ms)         | 136           | 140       | -         | 133.5    | 133.5          | 138.9     |
|            |                | Full field VER amplitude (μV)       | 5             | 7         | -         | 6.5      | 6.7            | 5.3       |
|            |                | Optic nerve area (mm <sup>2</sup> ) | 7.86          | 6.4       | 5.75      | -        | 7.63           | 5.95      |
| C          | 5              | Visual acuity (LogMAR)              | 0.02          | 0.16      | 0.02      | 0.14     | 0.1            | 0.04      |
|            |                | 25% contrast acuity (logMAR)        | 0.2           | 0.14      | 0.16      | 0.3      | 0.22           | 0.16      |
|            |                | 5% contrast acuity (logMAR)         | 0.5           | 0.68      | 0.46      | 0.48     | 0.52           | 0.4       |
|            |                | 1.25% contrast acuity (logMAR)      | 0.8           | 1.4       | 0.82      | 0.92     | 0.96           | 0.64      |
|            |                | Full field VER latency (ms)         | 119           | 118       | 113.7     | 116      | 108.3          | 115.2     |
|            |                | Full field VER amplitude (μV)       | 4             | 4.6       | 5.8       | 3.8      | 3.9            | 6.1       |
|            |                | Optic nerve area (mm <sup>2</sup> ) | 9.4           | 8.85      | 8.525     | 6.475    | 9.6            | 8.3       |
|            | 6              | Visual acuity (LogMAR)              | 0.04          | 0.18      | 0         | 0.02     | 0.06           | 0.02      |
|            |                | 25% contrast acuity (logMAR)        | 0.04          | 0.18      | 0         | 0.02     | 0.06           | 0.02      |
|            |                | 5% contrast acuity (logMAR)         | 0.5           | 0.6       | 0.56      | 0.42     | 0.52           | 0.26      |
|            |                | 1.25% contrast acuity (logMAR)      | 0.94          | 1.4       | 0.86      | 0.72     | 1.08           | 0.62      |
|            |                | Full field VER latency (ms)         | 119           | 118       | 118.2     | 120      | 112.2          | 115.5     |
|            |                | Full field VER amplitude (μV)       | 6             | 4.6       | 6.8       | 2.7      | 4.3            | 5.4       |
|            |                | Optic nerve area (mm <sup>2</sup> ) | 8.95          | 7.96      | 6.8       | 6.225    | 8.76           | 7.53      |

|          |           |                                     |       |       |       |       |       |       |
|----------|-----------|-------------------------------------|-------|-------|-------|-------|-------|-------|
| <b>D</b> | <b>7</b>  | Visual acuity (LogMAR)              | 0.16  | 0.3   | -     | 0.1   | 0.06  | 0.02  |
|          |           | 25% contrast acuity (logMAR)        | 0.3   | 0.54  | -     | 0.14  | 0.16  | 0.1   |
|          |           | 5% contrast acuity (logMAR)         | 0.6   | 0.78  | -     | 0.36  | 0.44  | 0.38  |
|          |           | 1.25% contrast acuity (logMAR)      | 0.88  | 0.92  | -     | 0.76  | 0.76  | 0.68  |
|          |           | Full field VER latency (ms)         | 123   | 126   | 124.5 | 123   | 120   | 124   |
|          |           | Full field VER amplitude (μV)       | 5     | 4     | 3.5   | 2.3   | 5     | 4     |
|          |           | Optic nerve area (mm <sup>2</sup> ) | 9.166 | 8.983 | -     | 8.816 | 8.14  | 8.82  |
|          | <b>8</b>  | Visual acuity (LogMAR)              | 0     | 0.02  | -     | -0.08 | 0.06  | 0.04  |
|          |           | 25% contrast acuity (logMAR)        | 0     | 0.12  | -     | 0.02  | 0.14  | 0.02  |
|          |           | 5% contrast acuity (logMAR)         | 0.3   | 0.46  | -     | 0.34  | 0.5   | 0.34  |
|          |           | 1.25% contrast acuity (logMAR)      | 0.2   | 0.8   | -     | 0.72  | 0.98  | 0.62  |
|          |           | Full field VER latency (ms)         | 123   | 143   | 126   | 123.6 | 158   | 139   |
|          |           | Full field VER amplitude (μV)       | 3     | 3     | 2     | 1.2   | 3     | 4     |
|          |           | Optic nerve area (mm <sup>2</sup> ) | 8.54  | 8.34  | -     | 7.8   | 8.28  | 8.74  |
| <b>E</b> | <b>9</b>  | Visual acuity (LogMAR)              | 0.2   | 0.24  | -     | 0.2   | 0.08  | 0.14  |
|          |           | 25% contrast acuity (logMAR)        | 0.5   | 0.42  | -     | 0.54  | 0.16  | 0.24  |
|          |           | 5% contrast acuity (logMAR)         | 0.8   | 0.7   | -     | 0.92  | 0.7   | 0.52  |
|          |           | 1.25% contrast acuity (logMAR)      | 1.7   | 1.7   | -     | 1.7   | 0.92  | 0.88  |
|          |           | Full field VER latency (ms)         | 151   | NR    | NR    | NR    | 156   | -     |
|          |           | Full field VER amplitude (μV)       | 3.2   | NR    | NR    | NR    | 4     | -     |
|          |           | Optic nerve area (mm <sup>2</sup> ) | 5.25  | 6.325 | -     | 6.975 | 6.725 | 8.675 |
|          | <b>10</b> | Visual acuity (LogMAR)              | 0.24  | 0.24  | -     | 0.22  | 0.2   | 0.12  |
|          |           | 25% contrast acuity (logMAR)        | 0.34  | 0.3   | -     | 0.22  | 0.36  | 0.36  |
|          |           | 5% contrast acuity (logMAR)         | 0.74  | 0.6   | -     | 0.6   | 0.64  | 0.6   |
|          |           | 1.25% contrast acuity (logMAR)      | 0.88  | 0.9   | -     | 0.94  | 0.98  | 0.88  |
|          |           | Full field VER latency (ms)         | 107   | NR    | NR    | NR    | NR    | -     |
|          |           | Full field VER amplitude (μV)       | 0.9   | NR    | NR    | NR    | NR    | -     |
|          |           | Optic nerve area (mm <sup>2</sup> ) | 7.05  | 7.625 | -     | 8.95  | 7.86  | 8.275 |
| <b>F</b> | <b>11</b> | Visual acuity (LogMAR)              | 0     | -0.16 | -     | 0.02  | -0.26 | -0.04 |
|          |           | 25% contrast acuity (logMAR)        | 0     | 0.02  | -     | 0     | 0.04  | 0.09  |
|          |           | 5% contrast acuity (logMAR)         | 0.36  | 0.28  | -     | 0.24  | 0.3   | 0.3   |
|          |           | 1.25% contrast acuity (logMAR)      | 0.72  | 0.5   | -     | 0.5   | 0.52  | 0.56  |
|          |           | Full field VER latency (ms)         | 144   | 129   | -     | 133.3 | 131   | 140.7 |
|          |           | Full field VER amplitude (μV)       | 3     | 4     | -     | 4.1   | 5     | 3.4   |
|          |           | Optic nerve area (mm <sup>2</sup> ) | 6.64  | 7.375 | -     | 8.08  | 7.775 | 8.58  |
|          | <b>12</b> | Visual acuity (LogMAR)              | 0.4   | -0.1  | -     | -0.04 | 0.02  | -0.06 |
|          |           | 25% contrast acuity (logMAR)        | 0.6   | 0.04  | -     | 0.1   | 0.1   | 0.1   |
|          |           | 5% contrast acuity (logMAR)         | 0.36  | 0.22  | -     | 0.2   | 0.3   | 0.22  |
|          |           | 1.25% contrast acuity (logMAR)      | 0.6   | 0.42  | -     | 0.5   | 0.54  | 0.54  |
|          |           | Full field VER latency (ms)         | 106   | 105   | -     | 107.1 | 102   | 104.1 |
|          |           | Full field VER amplitude (μV)       | 4     | 3     | -     | 4.5   | 3     | 2.4   |
|          |           | Optic nerve area (mm <sup>2</sup> ) | 8.45  | 8.84  | -     | 10.1  | 10.9  | 10.5  |
| <b>G</b> | <b>13</b> | Visual acuity (LogMAR)              | 0.18  | 0.24  | -     | 0.78  | 0.14  | 0.04  |
|          |           | 25% contrast acuity (logMAR)        | 0.38  | 0.36  | -     | 1.04  | 0.2   | 0.14  |
|          |           | 5% contrast acuity (logMAR)         | 0.7   | 0.62  | -     | 1.7   | 0.4   | 0.26  |
|          |           | 1.25% contrast acuity (logMAR)      | 0.8   | 0.96  | -     | 1.7   | 0.6   | 0.4   |
|          |           | Full field VER latency (ms)         | 114   | 123.6 | -     | 130.5 | 120.9 | 117.6 |
|          |           | Full field VER amplitude (μV)       | 5     | 5.6   | -     | 1.8   | 7.2   | 5.1   |

|                                     |                                     |                                     |       |       |       |       |       |       |
|-------------------------------------|-------------------------------------|-------------------------------------|-------|-------|-------|-------|-------|-------|
| H                                   | 14                                  | Optic nerve area (mm <sup>2</sup> ) | 9.26  | 8.2   | -     | 8.6   | 8.3   | 9.025 |
|                                     |                                     | Visual acuity (LogMAR)              | 0.4   | 0.38  | -     | 0.76  | 0.12  | 0.1   |
|                                     | 25% contrast acuity (logMAR)        | 0.64                                | 0.58  | -     | 0.98  | 0.2   | 0.18  |       |
|                                     | 5% contrast acuity (logMAR)         | 0.8                                 | 0.76  | -     | 1.7   | 0.36  | 0.36  |       |
|                                     | 1.25% contrast acuity (logMAR)      | 1                                   | 1     | -     | 1.7   | 0.56  | 0.54  |       |
|                                     | Full field VER latency (ms)         |                                     |       |       |       |       |       |       |
|                                     | Full field VER amplitude (μV)       |                                     |       |       |       |       |       |       |
|                                     | Optic nerve area (mm <sup>2</sup> ) | 7.8                                 | 8.23  | -     | 7.266 | 7.46  | 7.625 |       |
|                                     | 15                                  | Visual acuity (LogMAR)              | 0.66  | 0.86  | -     | 0.74  | 0.86  | 0.96  |
|                                     |                                     | 25% contrast acuity (logMAR)        | 0.8   | 0.88  | -     | 1     | 0.98  | 0.98  |
|                                     | 5% contrast acuity (logMAR)         | 1.7                                 | 1.7   | -     | 1.7   | 1.58  | 1.48  |       |
|                                     | 1.25% contrast acuity (logMAR)      | 1.7                                 | 1.7   | -     | 1.7   | 1.7   | 1.7   |       |
|                                     | Full field VER latency (ms)         | NR                                  | NR    | -     | NR    | NR    | NR    |       |
| Full field VER amplitude (μV)       | NR                                  | NR                                  | -     | NR    | NR    | NR    |       |       |
| Optic nerve area (mm <sup>2</sup> ) | 7.76                                | 7.475                               | -     | 8.025 | 7.2   | 8.2   |       |       |
| I                                   | 16                                  | Visual acuity (LogMAR)              | 0.28  | 0.48  | -     | 0.68  | 0.56  | 0.66  |
|                                     |                                     | 25% contrast acuity (logMAR)        | 0.6   | 0.6   | -     | 0.7   | 0.74  | 0.86  |
|                                     | 5% contrast acuity (logMAR)         | 0.84                                | 0.92  | -     | 1.7   | 1.48  | 1.26  |       |
|                                     | 1.25% contrast acuity (logMAR)      | 1.7                                 | 1.7   | -     | 1.7   | 1.7   | 1.7   |       |
|                                     | Full field VER latency (ms)         | 111                                 | NR    | -     | NR    | NR    | NR    |       |
|                                     | Full field VER amplitude (μV)       | 4                                   | NR    | -     | NR    | NR    | NR    |       |
|                                     | Optic nerve area (mm <sup>2</sup> ) | 8.73                                | 8.55  | -     | 7.7   | 8.1   | 9.067 |       |
|                                     | 17                                  | Visual acuity (LogMAR)              | 0.04  | 0.06  | -     | 0.04  | 0.04  | -0.04 |
|                                     |                                     | 25% contrast acuity (logMAR)        | 0.02  | 0.14  | -     | 0.12  | 0.08  | 0.04  |
|                                     | 5% contrast acuity (logMAR)         | 0.36                                | 0.42  | -     | 0.42  | 0.38  | 0.28  |       |
|                                     | 1.25% contrast acuity (logMAR)      | 0.7                                 | 0.56  | -     | 0.78  | 0.76  | 0.66  |       |
|                                     | Full field VER latency (ms)         | 133                                 | 142.2 | 139   | 134.1 | 133.8 | 142   |       |
|                                     | Full field VER amplitude (μV)       | 8                                   | 7.9   | 3.5   | 1.8   | 3.8   | 5     |       |
| Optic nerve area (mm <sup>2</sup> ) | 7.65                                | 7.125                               | -     | 7.275 | 8.276 | 7.725 |       |       |
| J                                   | 18                                  | Visual acuity (LogMAR)              | 0.06  | 0.14  | -     | 0.08  | 0.06  | -0.02 |
|                                     |                                     | 25% contrast acuity (logMAR)        | 0.18  | 0.16  | -     | 0.2   | 0.16  | 0.16  |
|                                     | 5% contrast acuity (logMAR)         | 0.46                                | 0.4   | -     | 0.52  | 0.48  | 0.46  |       |
|                                     | 1.25% contrast acuity (logMAR)      | 0.92                                | 0.78  | -     | 0.98  | 0.88  | 0.88  |       |
|                                     | Full field VER latency (ms)         | 144                                 | 156.9 | 148   | 152.7 | 133.8 | 164   |       |
|                                     | Full field VER amplitude (μV)       | 5                                   | 4.5   | 4.3   | 2.2   | 4     | 3     |       |
|                                     | Optic nerve area (mm <sup>2</sup> ) | 8.125                               | 7.3   | -     | 7.2   | 6.33  | 6.66  |       |
|                                     | 19                                  | Visual acuity (LogMAR)              | 0.18  | 0.18  | -     | 0.26  | 0.2   | 0.02  |
|                                     |                                     | 25% contrast acuity (logMAR)        | 0.24  | 0.3   | -     | 0.32  | 0.3   | 0.18  |
|                                     | 5% contrast acuity (logMAR)         | 0.5                                 | 0.48  | -     | 0.52  | 0.44  | 0.36  |       |
|                                     | 1.25% contrast acuity (logMAR)      | 0.7                                 | 0.66  | -     | 0.78  | 0.62  | 0.58  |       |
|                                     | Full field VER latency (ms)         | 164                                 | 163.8 | -     | NR    | 168.3 | -     |       |
|                                     | Full field VER amplitude (μV)       | 4                                   | 3.7   | -     | NR    | 1.3   | -     |       |
| Optic nerve area (mm <sup>2</sup> ) | 8.1                                 | 8.53                                | -     | 9.63  | 9.925 | 9.73  |       |       |
| 20                                  | Visual acuity (LogMAR)              | 0.14                                | 0.14  | -     | 0.46  | 0.14  | 0.18  |       |
|                                     | 25% contrast acuity (logMAR)        | 0.44                                | 0.28  | -     | 0.38  | 0.34  | 0.16  |       |
|                                     | 5% contrast acuity (logMAR)         | 0.6                                 | 0.4   | -     | 0.58  | 0.4   | 0.38  |       |
|                                     | 1.25% contrast acuity (logMAR)      | 0.74                                | 0.66  | -     | 0.76  | 0.56  | 0.6   |       |

|                                     |       |       |   |       |     |      |
|-------------------------------------|-------|-------|---|-------|-----|------|
| Full field VER latency (ms)         | 154   | 156.9 | - | NR    | 171 | -    |
| Full field VER amplitude (μV)       | 3     | 2.5   | - | NR    | 0.7 | -    |
| Optic nerve area (mm <sup>2</sup> ) | 8.175 | 9.1   | - | 9.275 | 9.2 | 8.86 |

NR = No response; - = not performed.



**Supplementary figure 1: Coronal T2-weighted MRI of the optic nerves**

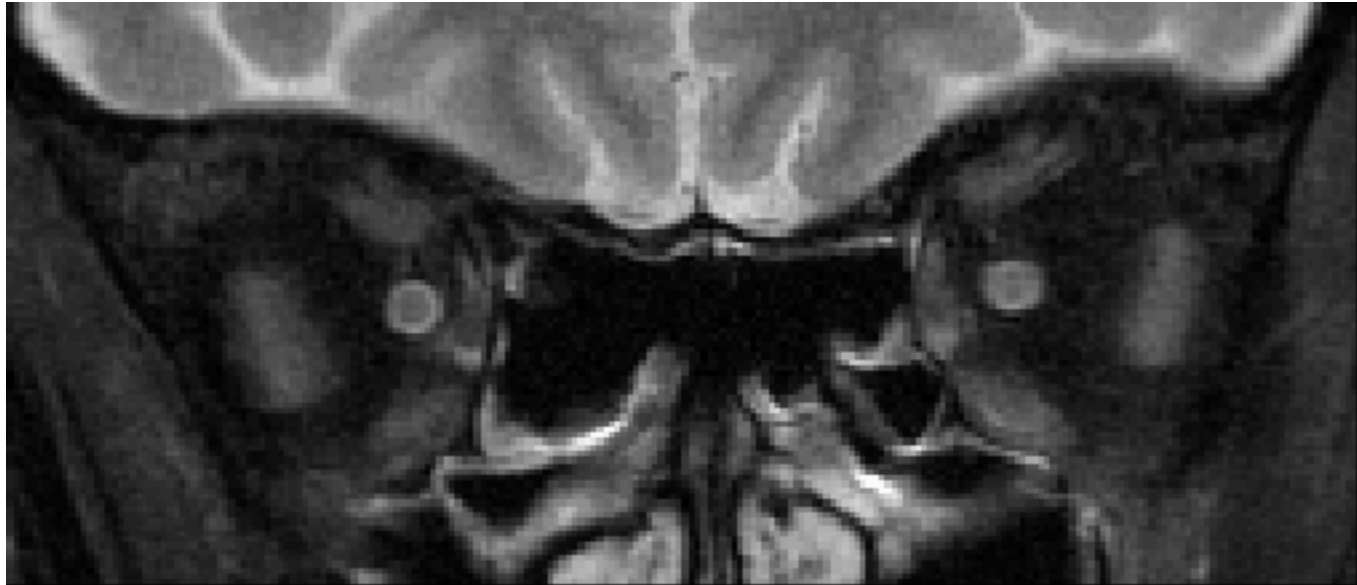

Hyperintensity of the left optic nerve is shown on coronal T2-weighted MR imaging.

Supplementary figure 2A: change in visual acuity over time

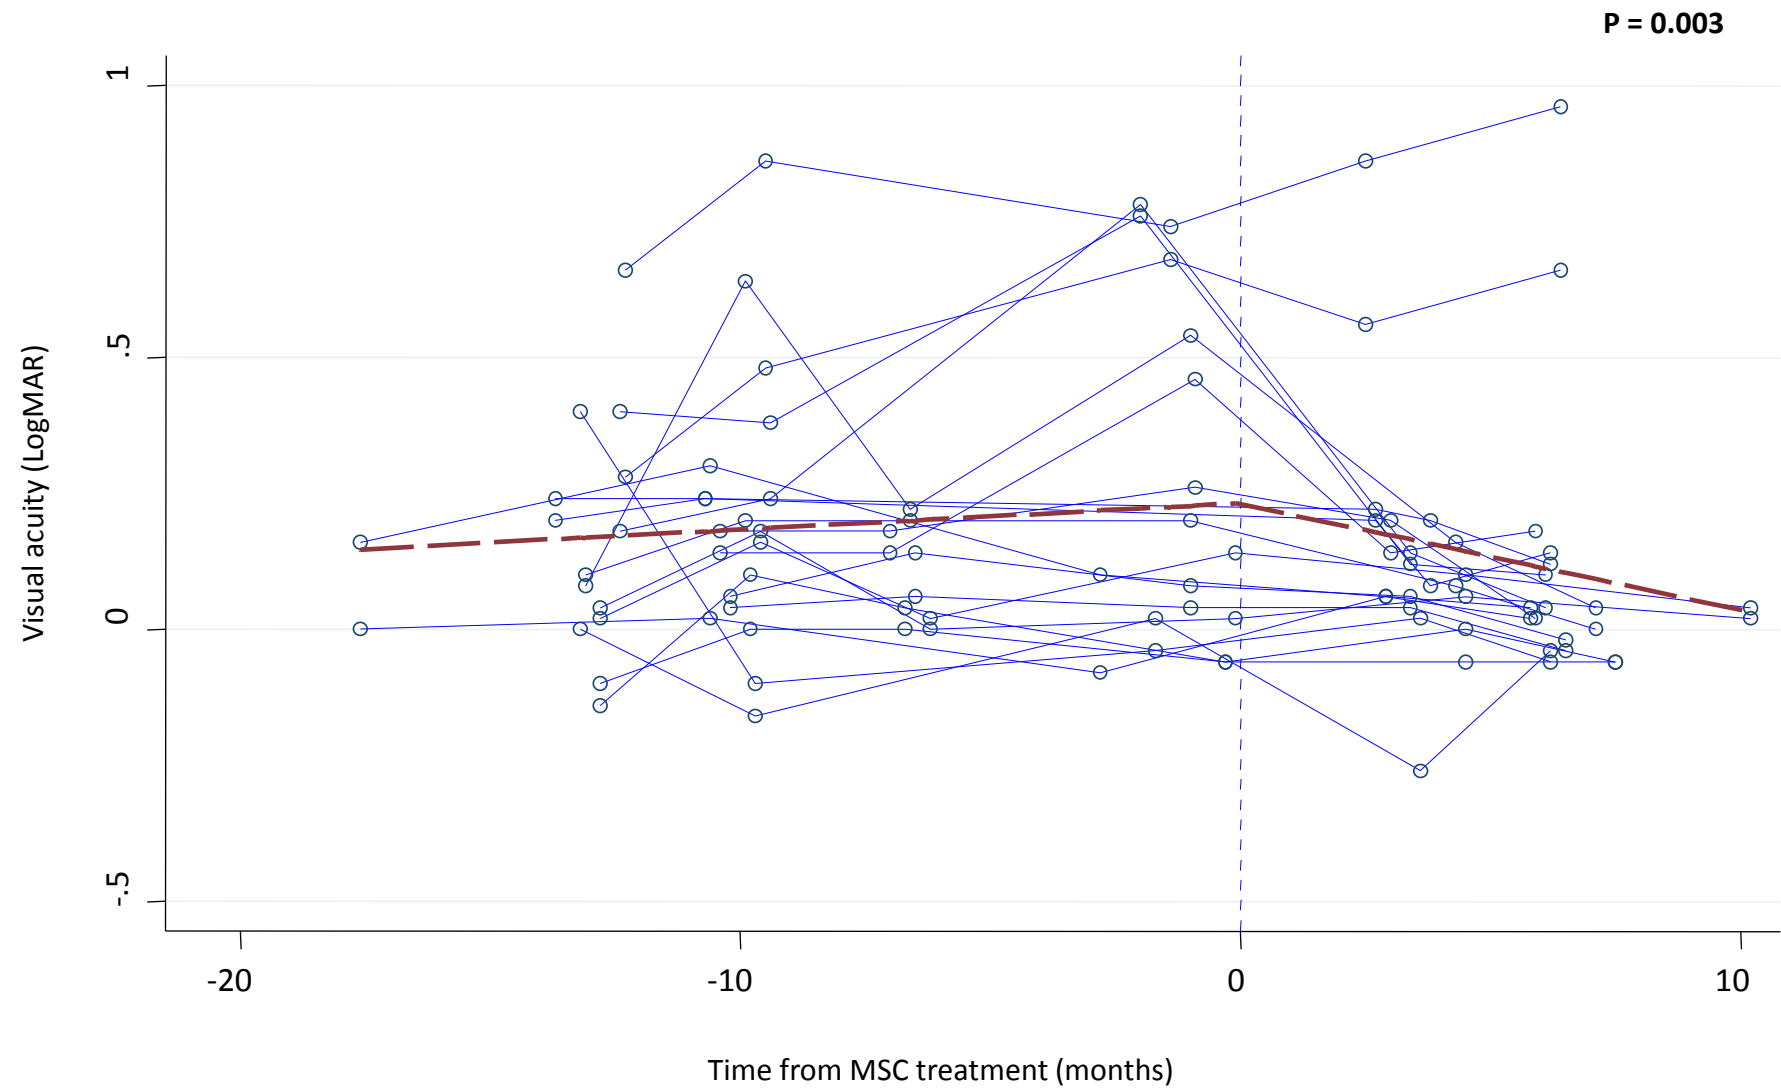

Change in visual acuity is shown for individual patients before and after treatment connected by solid lines. Pre- and post-treatment average rates of change are also shown connected in red dash. The significance test are shown is for a change in the gradient at the time of intervention.

Supplementary figure 2B: change in 25% contrast acuity over time

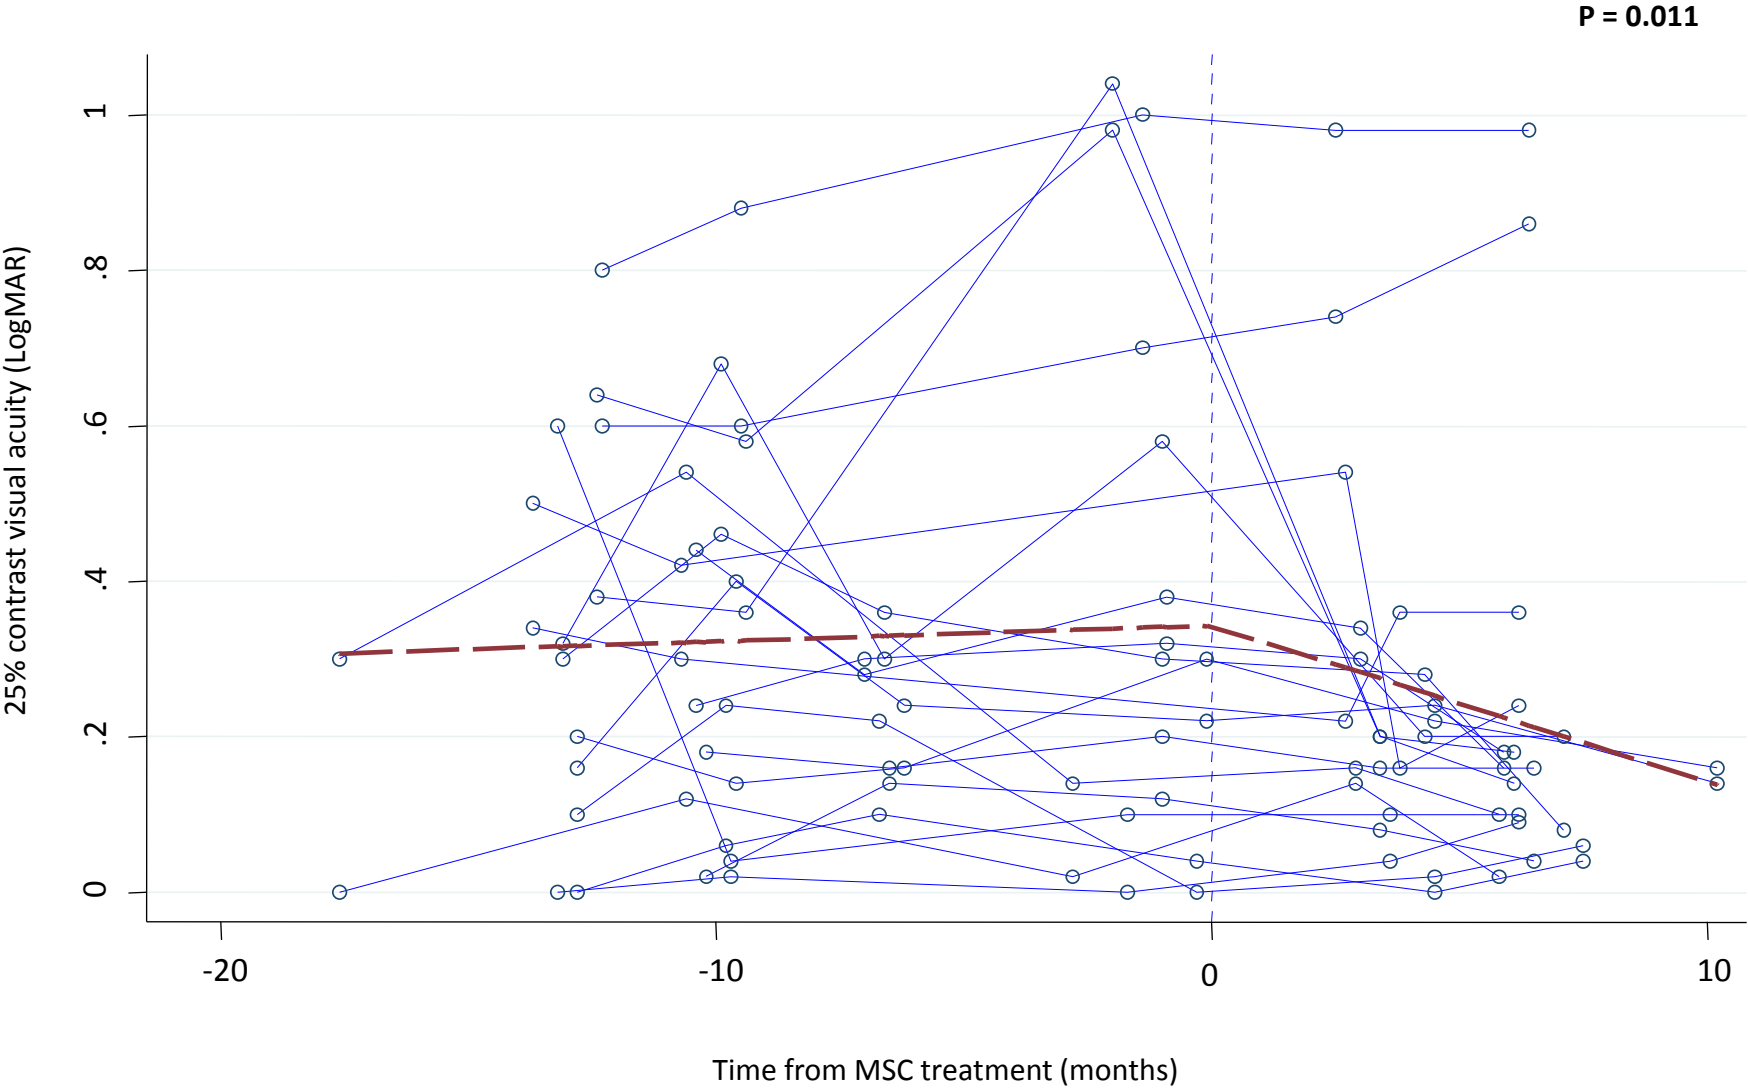

Change in 25% contrast visual acuity is shown for individual patients before and after treatment connected by solid lines. Pre- and post-treatment average rates of change are also shown connected in red dash. The significance test are shown is for a change in the gradient at the time of intervention.

Supplementary figure 2C: change in 5% contrast acuity over time

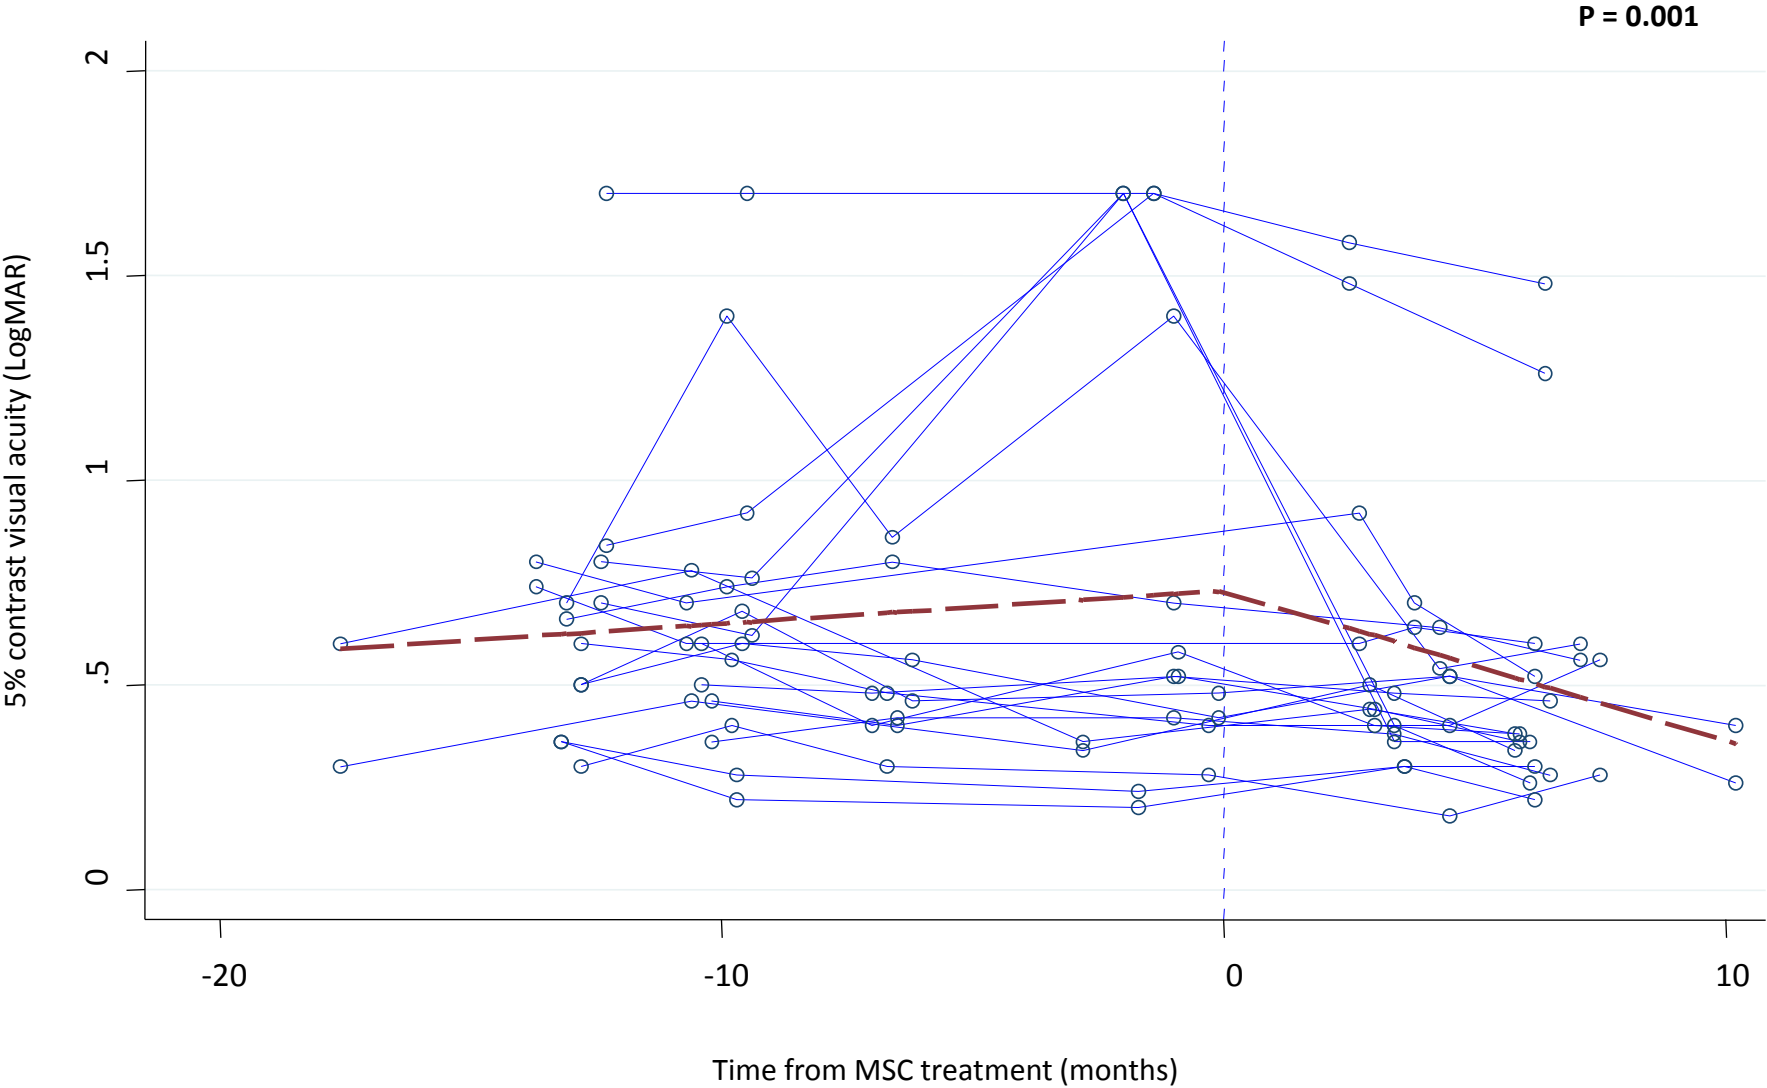

Change in 5% contrast visual acuity is shown for individual patients before and after treatment connected by solid lines. Pre- and post-treatment average rates of change are also shown connected in red dash. The significance test are shown is for a change in the gradient at the time of intervention.

Supplementary figure 2D: change in 1.25% contrast acuity over time

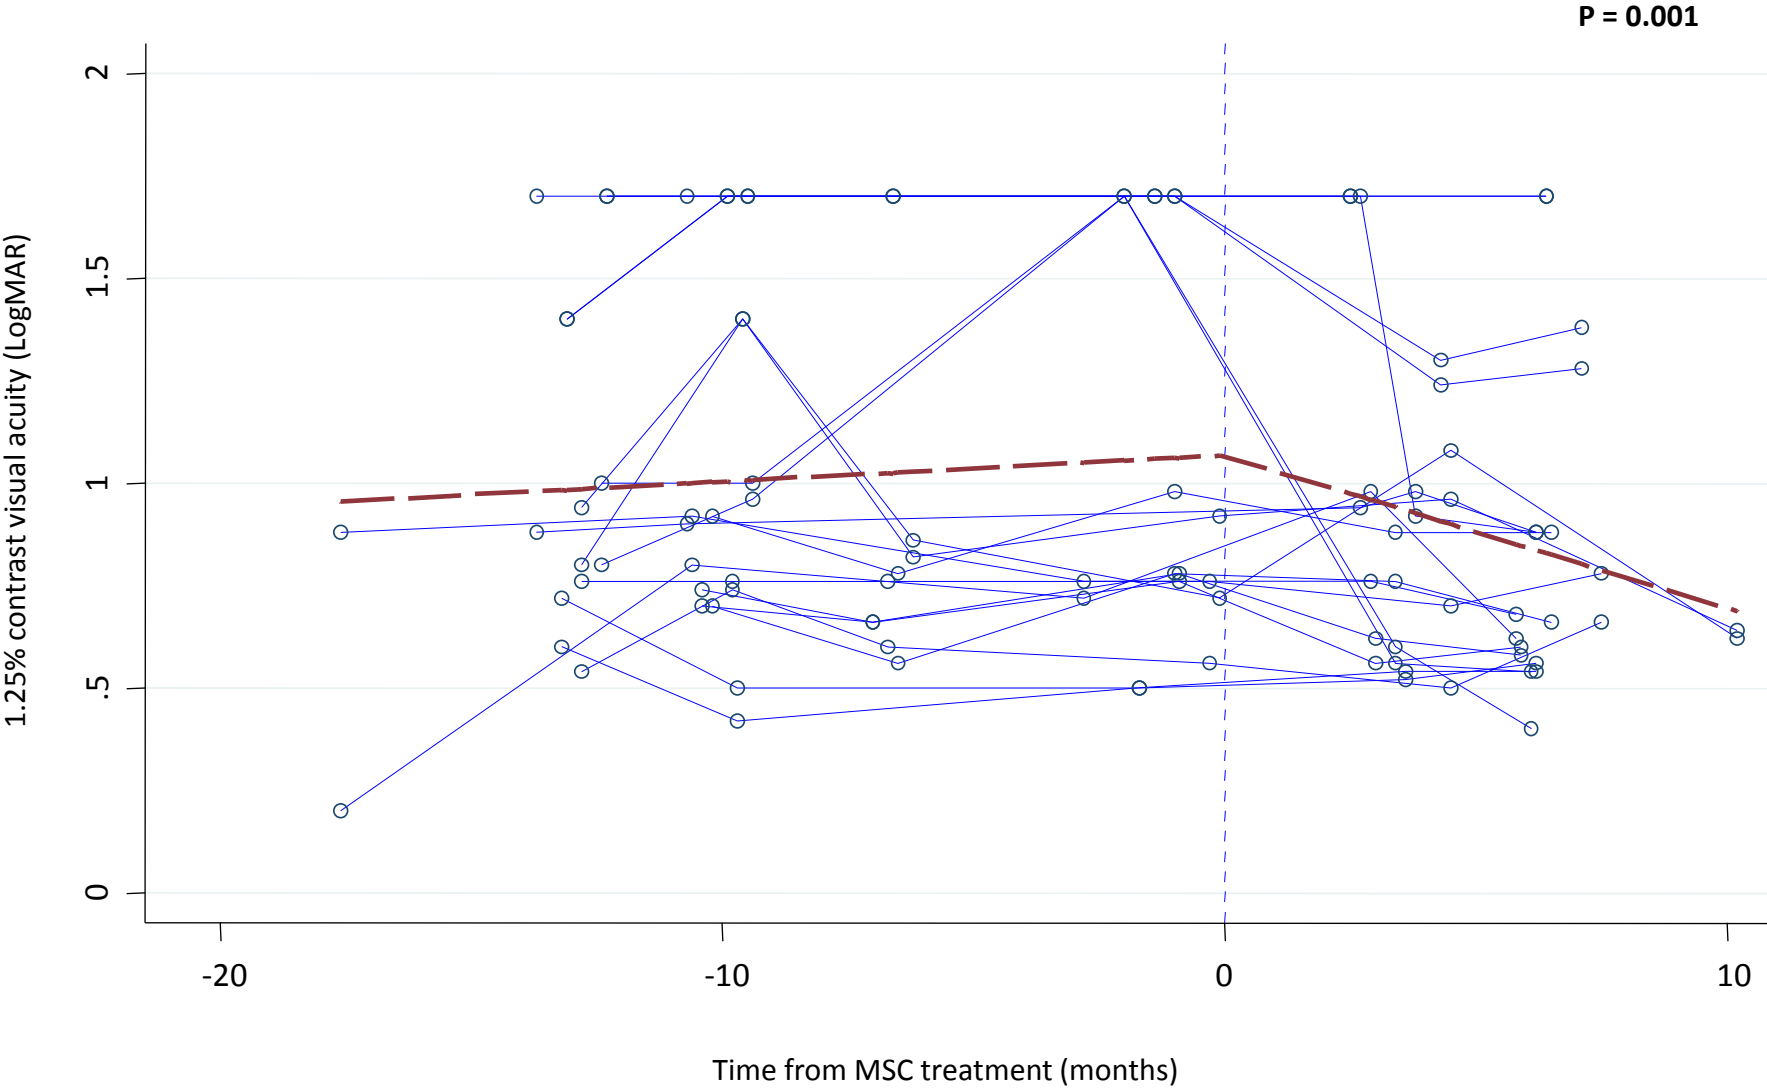

Change in 1.25% contrast visual acuity is shown for individual patients before and after treatment connected by solid lines. Pre- and post-treatment average rates of change are also shown connected in red dash. The significance test are shown is for a change in the gradient at the time of intervention.

Supplementary figure 2E: change in colour vision over time

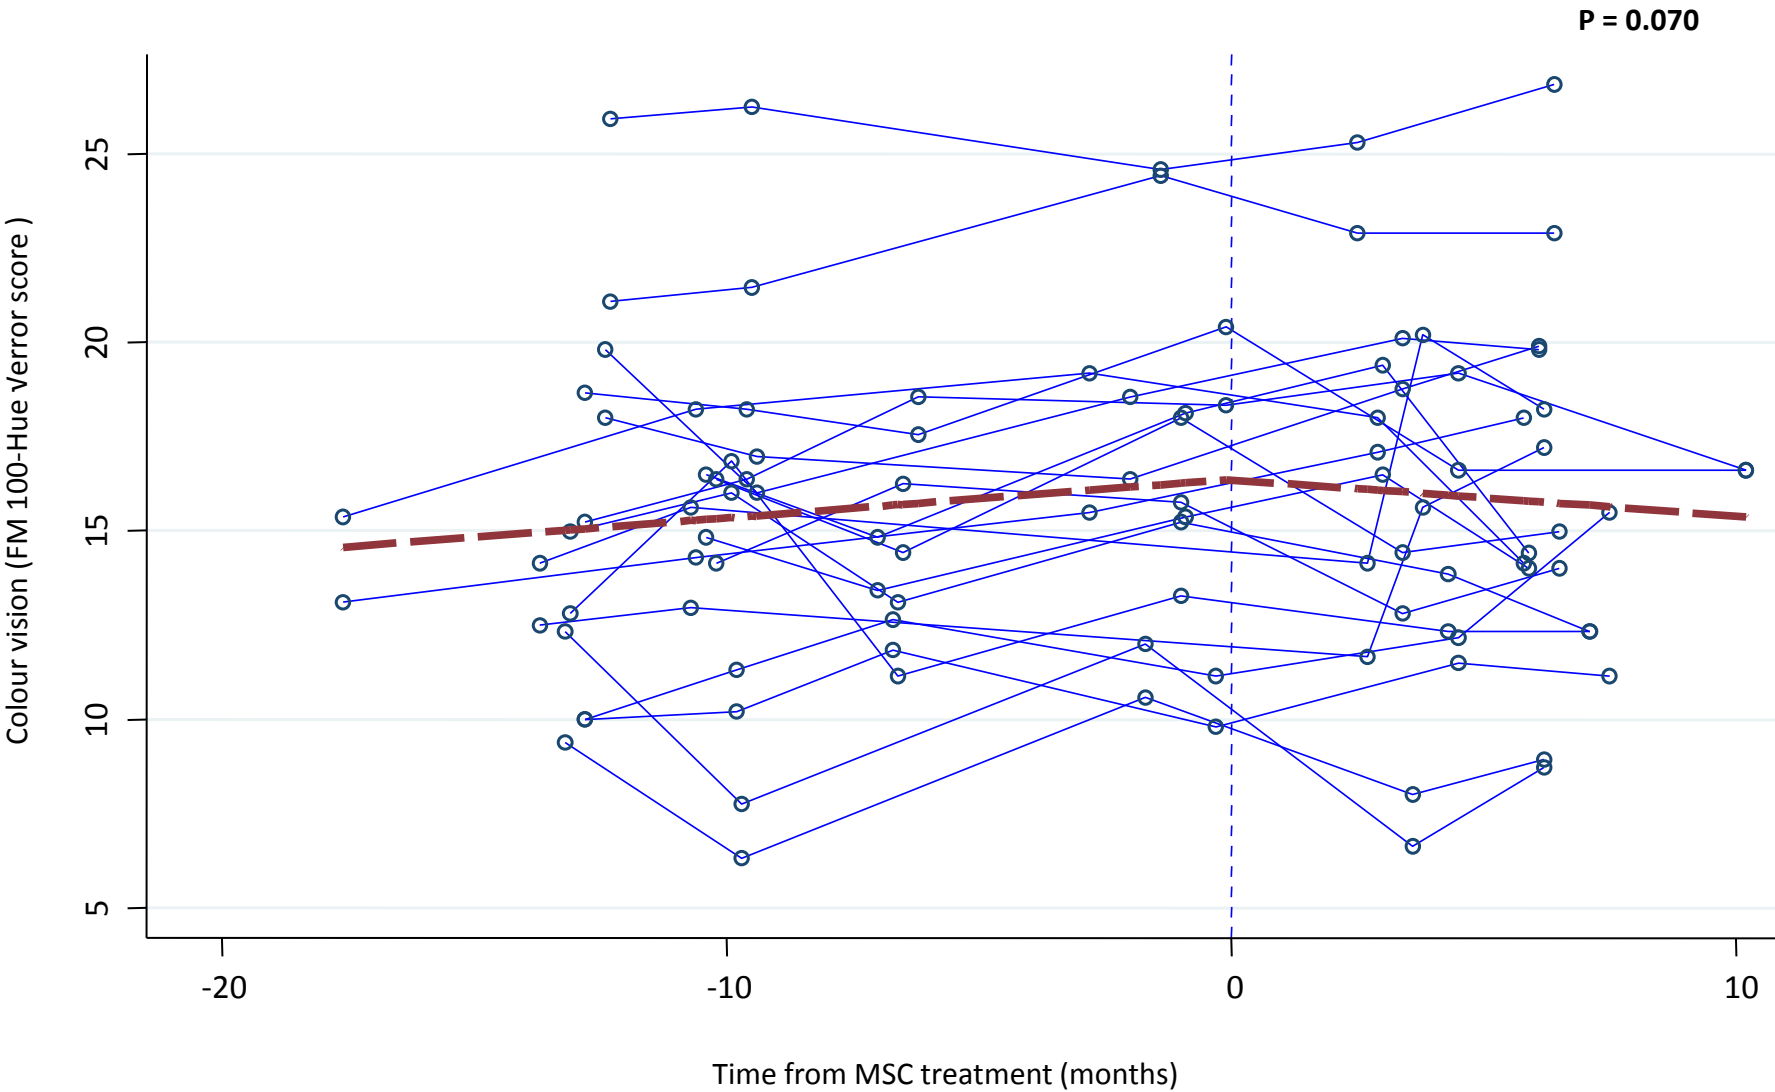

Change in colour vision (square root total error score) is shown for individual patients before and after treatment connected by solid lines. Pre- and post-treatment average rates of change are also shown connected in red dash. The significance test are shown is for a change in the gradient at the time of intervention.

Supplementary figure 2F: change in visual field over time

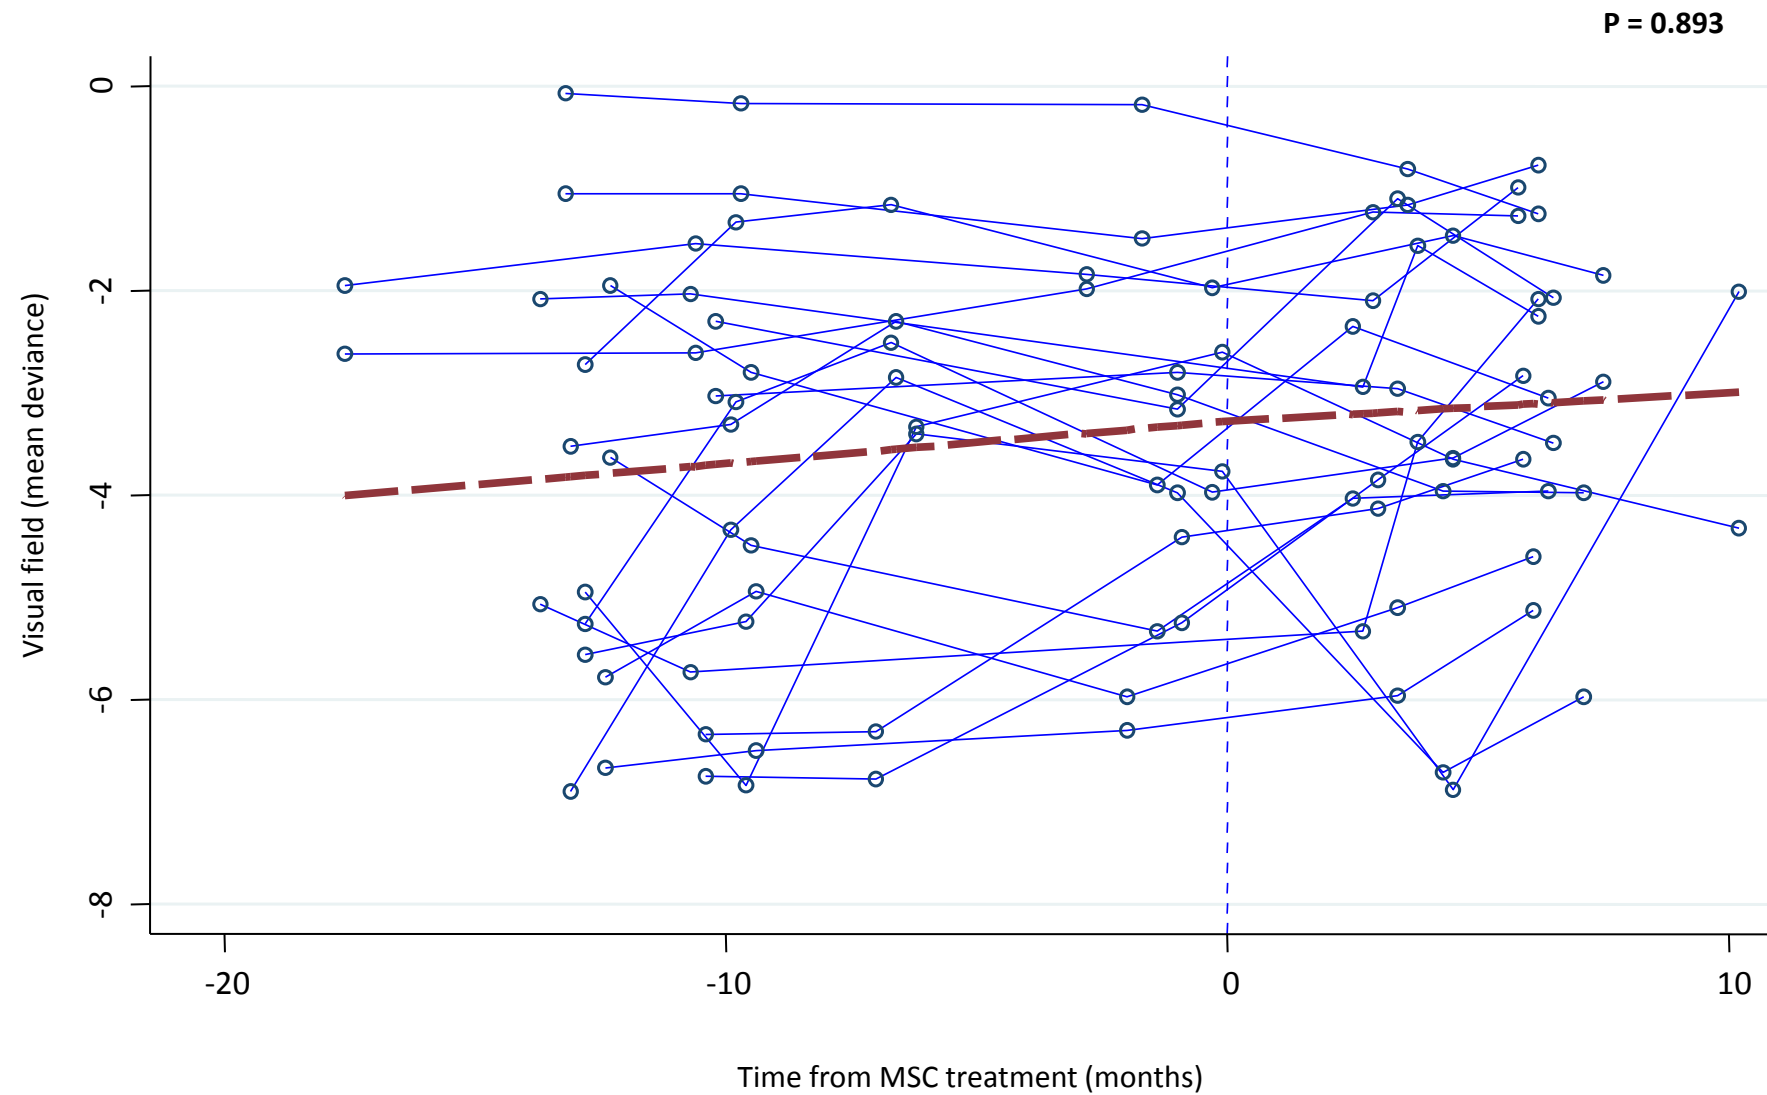

Change in 25% contrast visual acuity is shown for individual patients before and after treatment connected by solid lines. Pre- and post-treatment average rates of change are also shown connected in red dash. The significance test are shown is for a change in the gradient at the time of intervention.

Supplementary figure 2G: change in visual evoked response (VER) latency over time

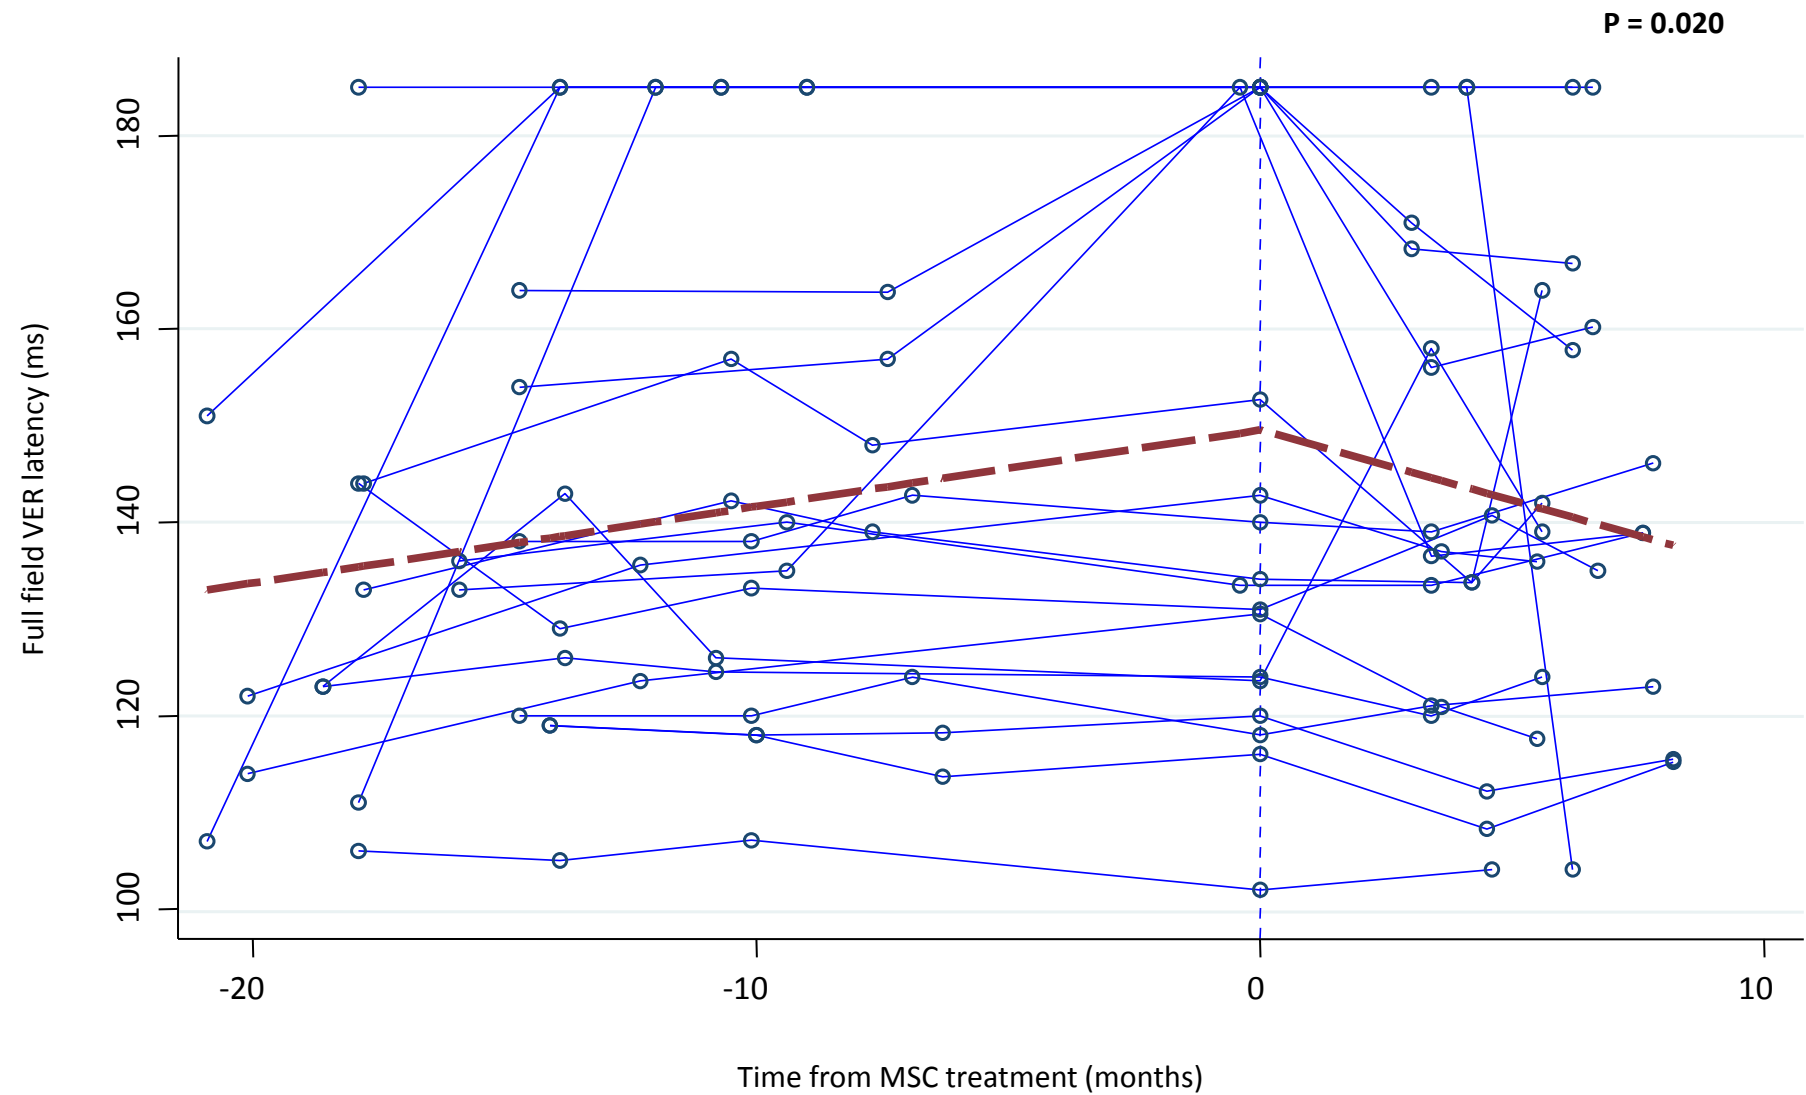

Change in full field visual evoked response latency is shown for individual patients before and after treatment connected by solid lines. Pre- and post-treatment average rates of change are also shown connected in red dash. The significance test are shown is for a change in the gradient at the time of intervention.



Supplementary figure 2H: change in visual evoked response (VER) amplitude over time

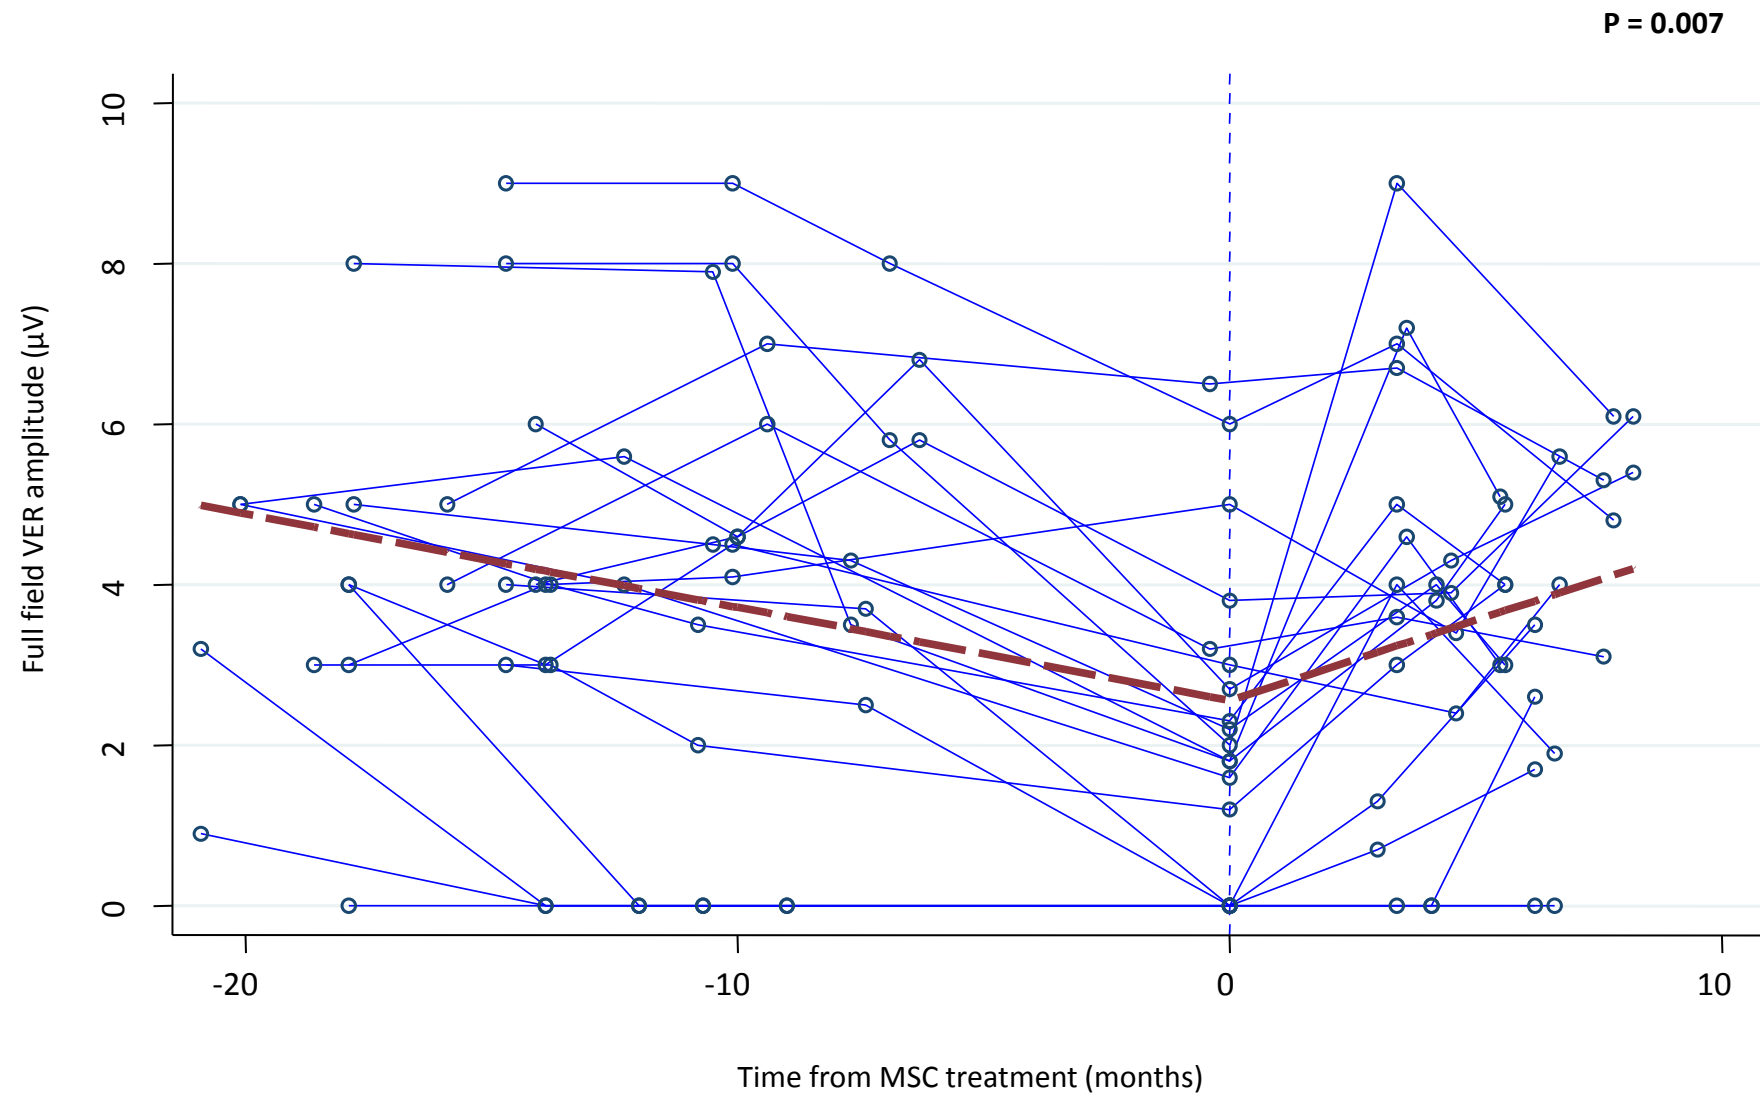

Change in full field visual evoked response amplitude is shown for individual patients before and after treatment connected by solid lines. Pre- and post-treatment average rates of change are also shown connected in red dash. The significance test are shown is for a change in the gradient at the time of intervention.

Supplementary figure 2I: change in macular volume over time

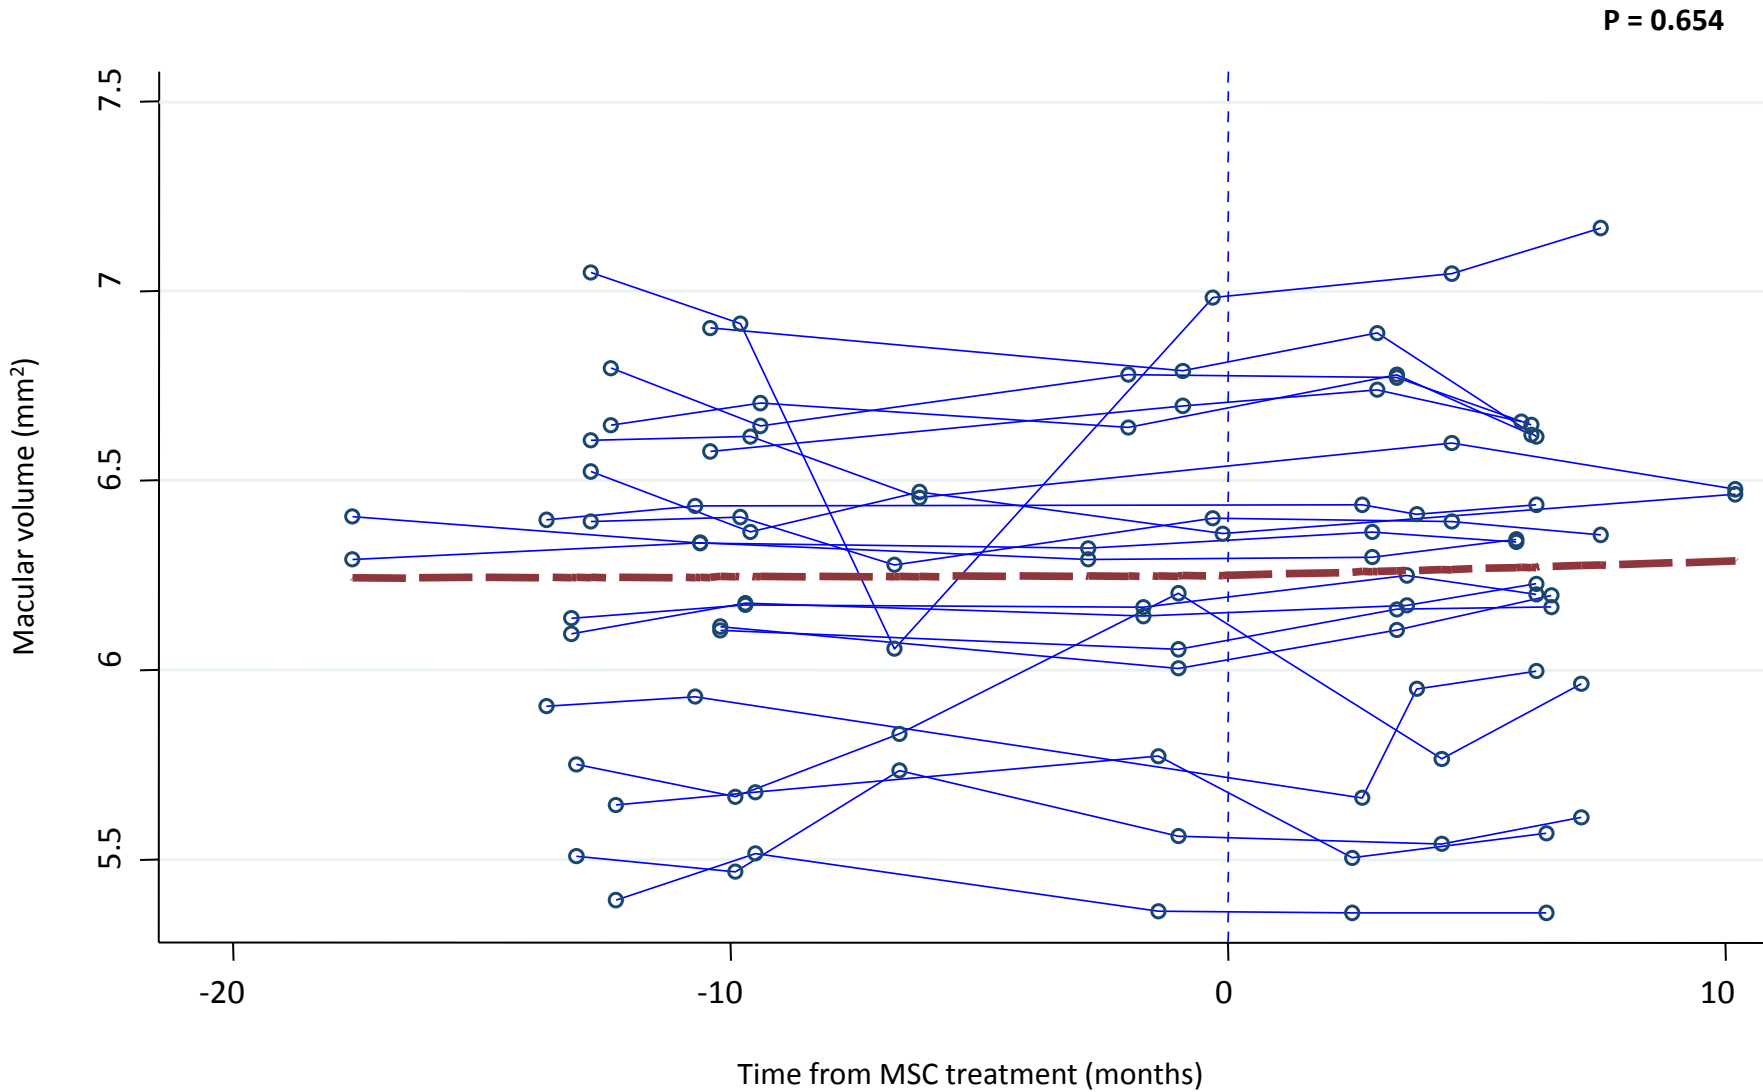

Change in macular volume is shown for individual patients before and after treatment connected by solid lines. Pre- and post-treatment average rates of change are also shown connected in red dash. The significance test are shown is for a change in the gradient at the time of intervention.

Supplementary figure 2J: change in retinal nerve fibre layer thickness over time

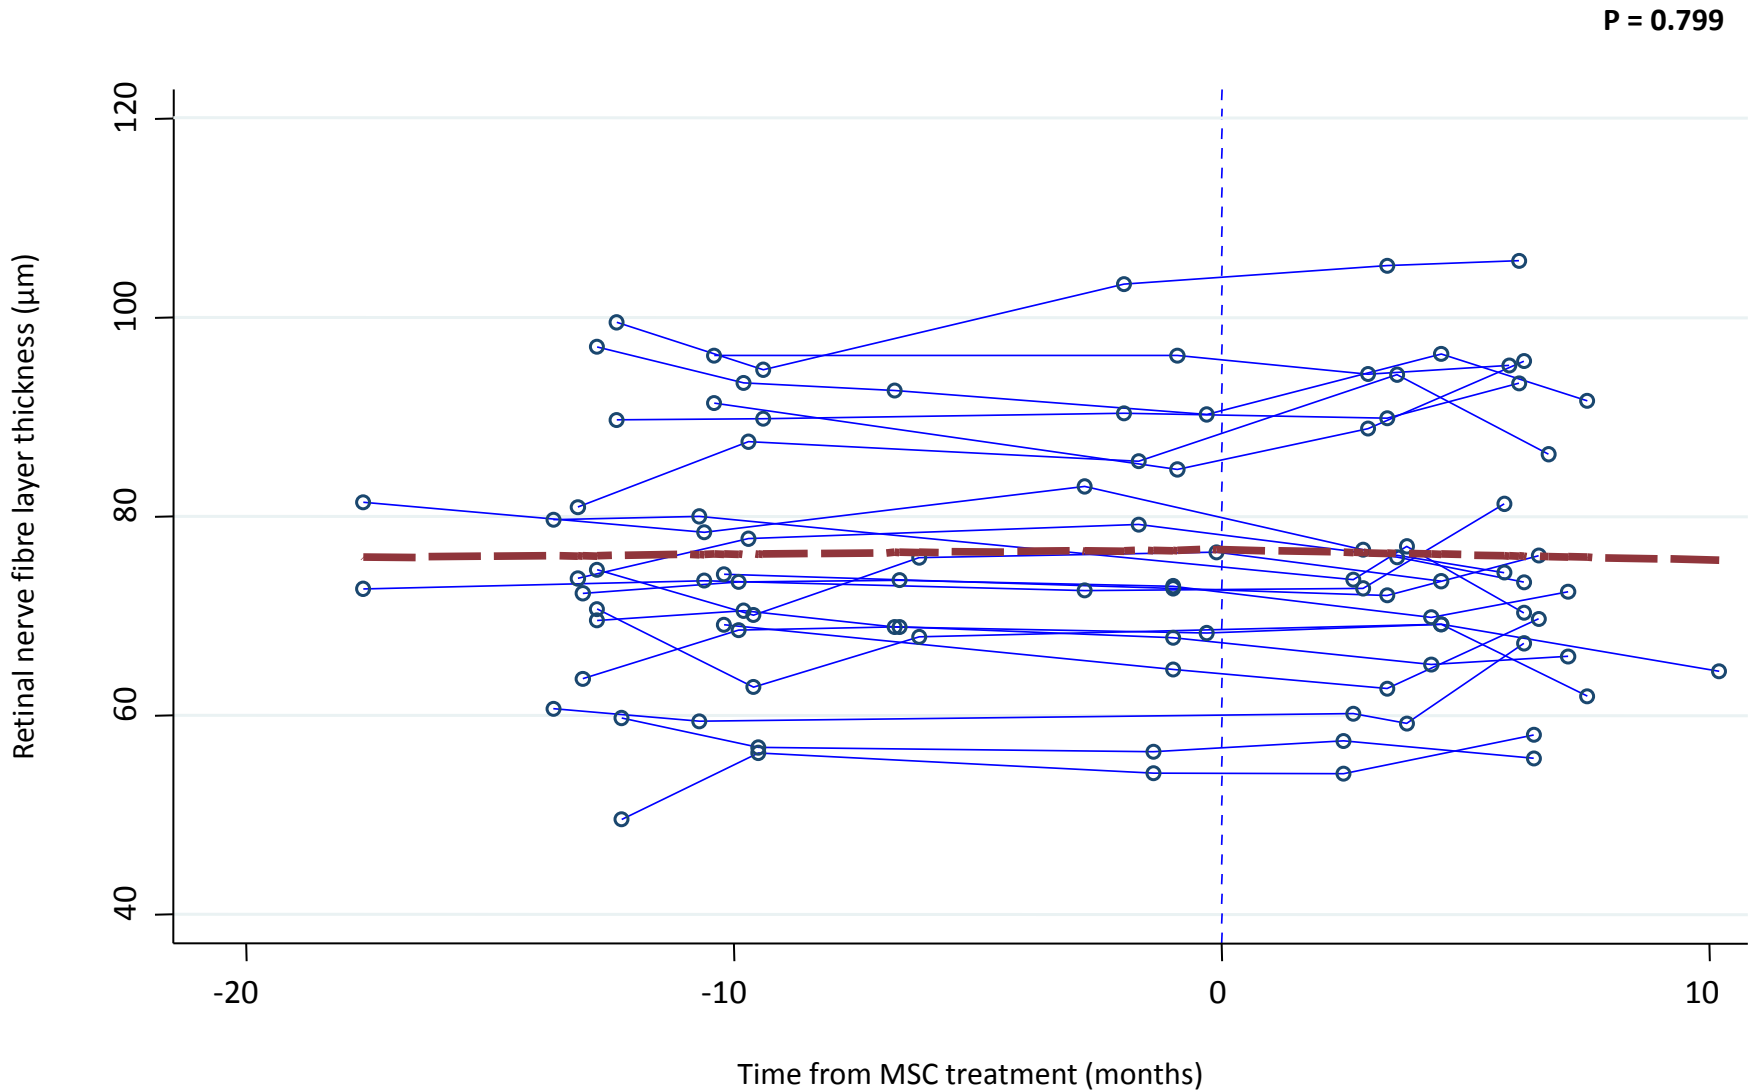

Change in retinal nerve fibre layer thickness is shown for individual patients before and after treatment connected by solid lines. Pre- and post-treatment average rates of change are also shown connected in red dash. The significance test are shown is for a change in the gradient at the time of intervention.

Supplementary figure 2K: change in optic nerve area over time

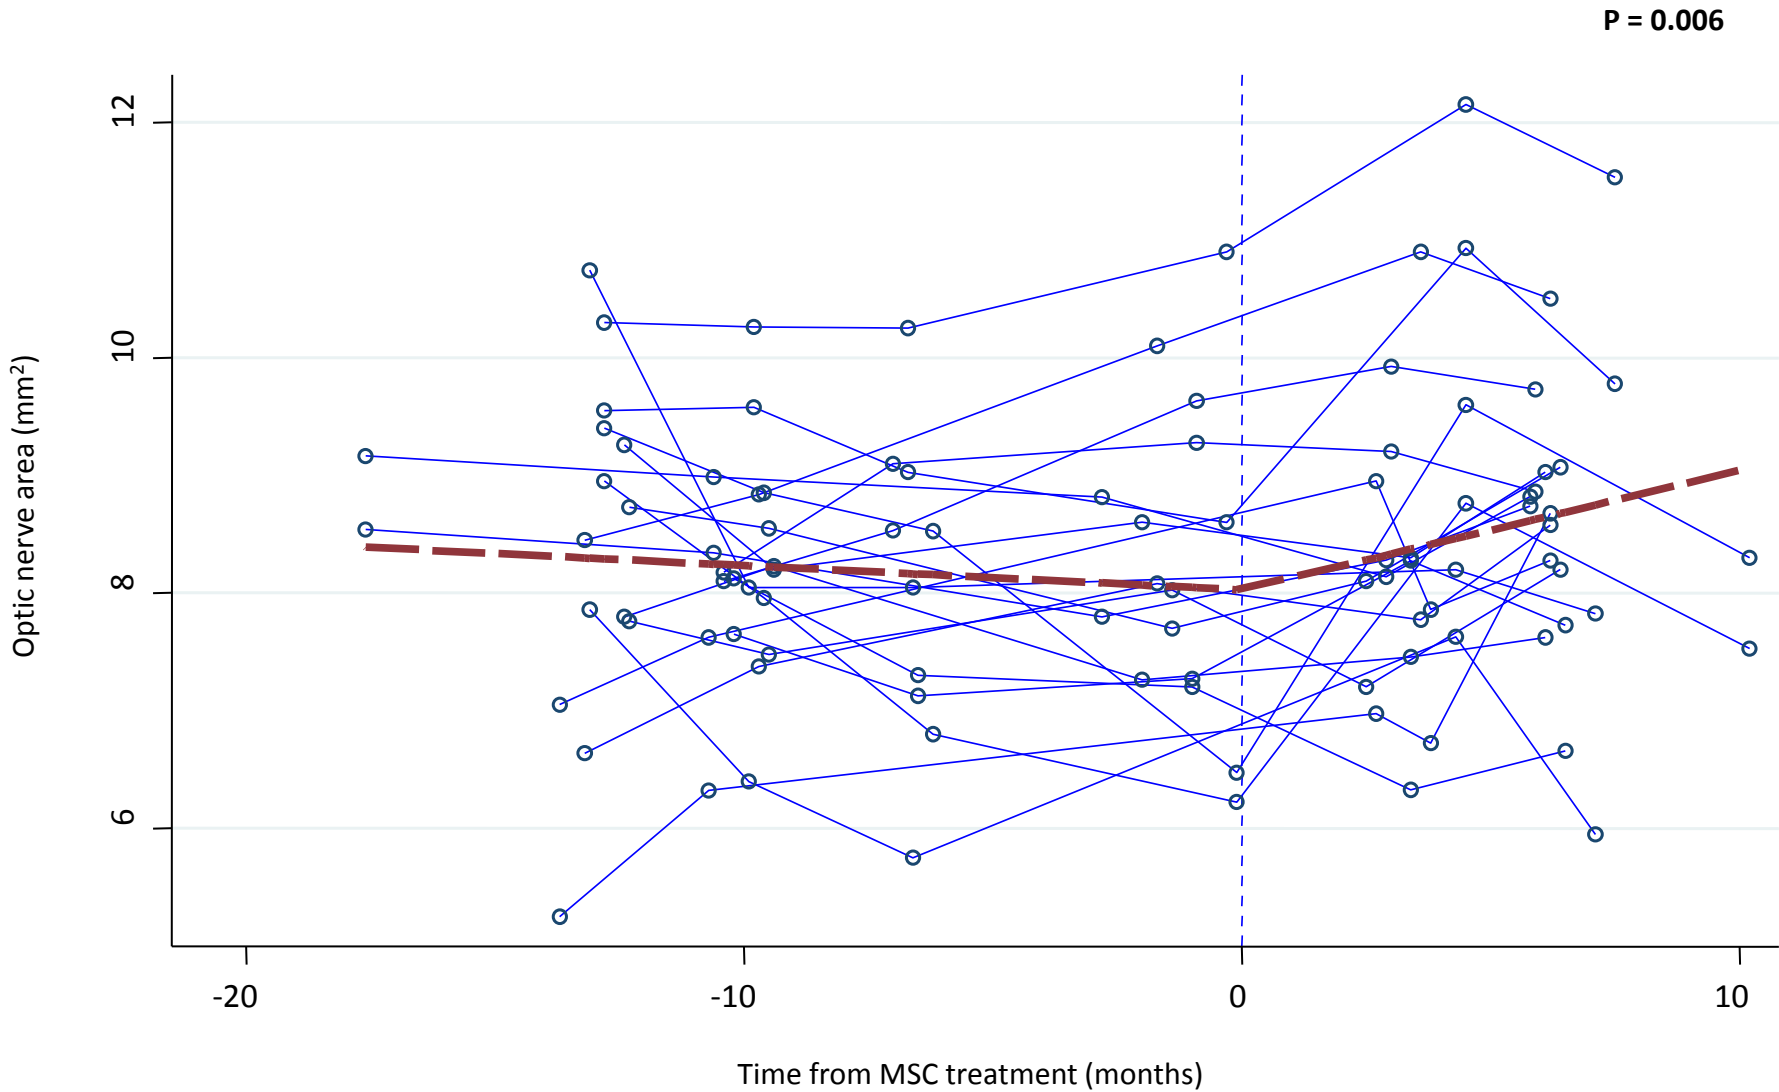

Change in optic nerve area is shown for individual patients before and after treatment connected by solid lines. Pre- and post-treatment average rates of change are also shown connected in red dash. The significance test are shown is for a change in the gradient at the time of intervention.

Supplementary figure 2L: change in optic nerve magnetization transfer ratio (MTR) over time

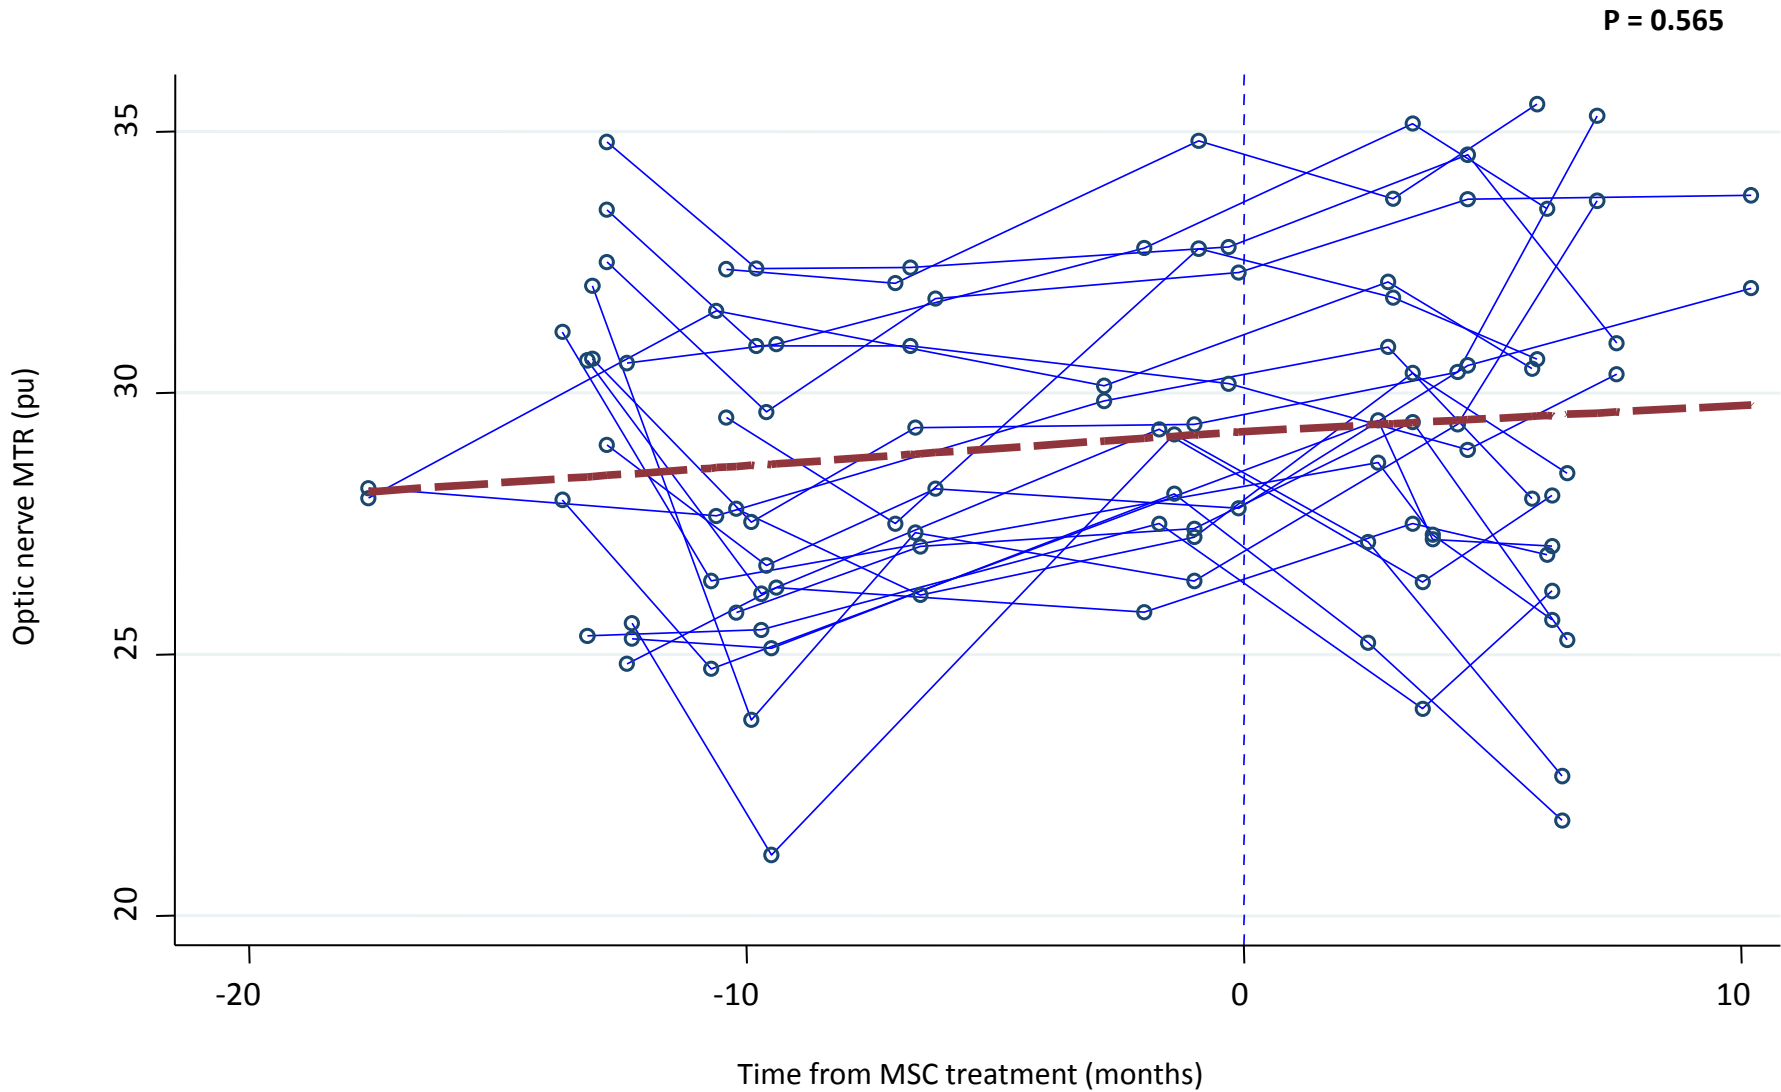

Change in optic nerve magnetization transfer ratio is shown for individual patients before and after treatment connected by solid lines. Pre- and post-treatment average rates of change are also shown connected in red dash. The significance test are shown is for a change in the gradient at the time of intervention.

Change in expanded disability status scale (EDSS) is shown for individual patients before and after treatment connected by solid lines. Pre- and post-treatment average rates of change are also shown connected in red dash. The significance test are shown is for a change in the gradient at the time of intervention.

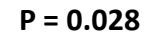

Supplementary figure 2N: change in multiple sclerosis functional composite (MSFC) over time

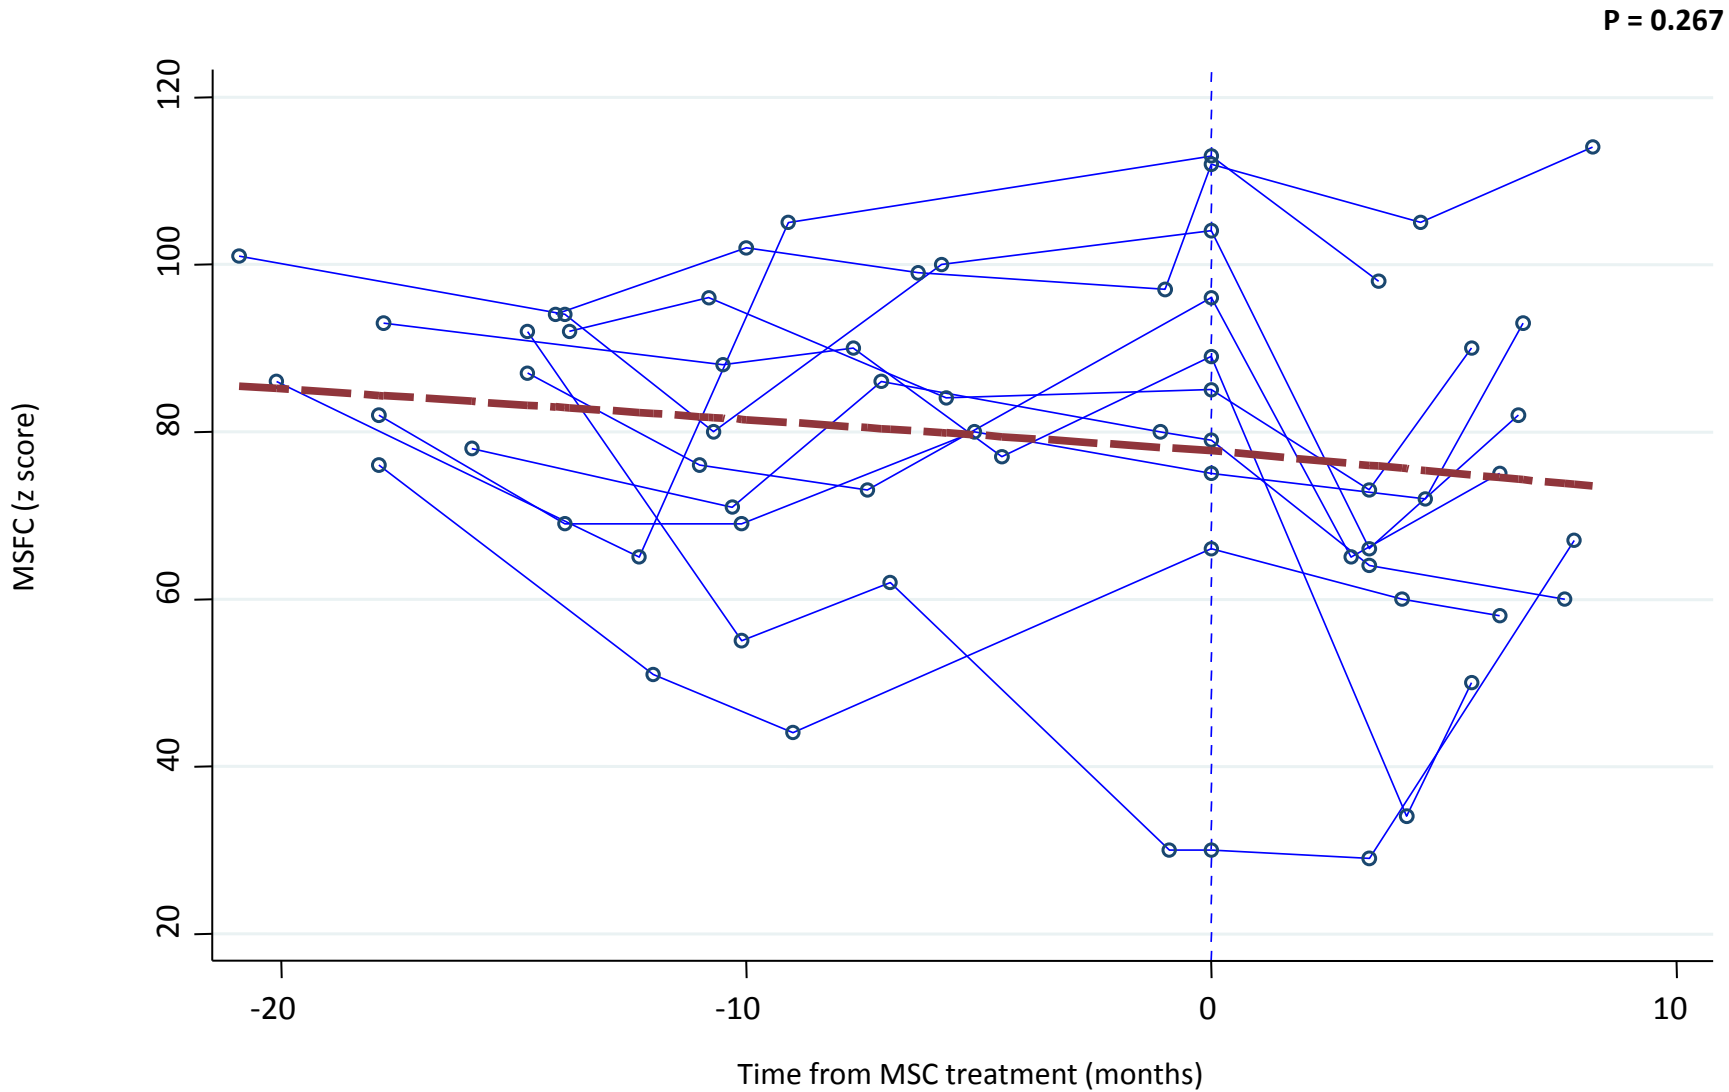

Change in multiple sclerosis functional composite is shown for individual patients before and after treatment connected by solid lines. Pre- and post-treatment average rates of change are also shown connected in red dash. The significance test are shown is for a change in the gradient at the time of intervention.

Supplementary figure 2O: change in Addenbrooke’s cognitive examination revised (ACE-R) over time

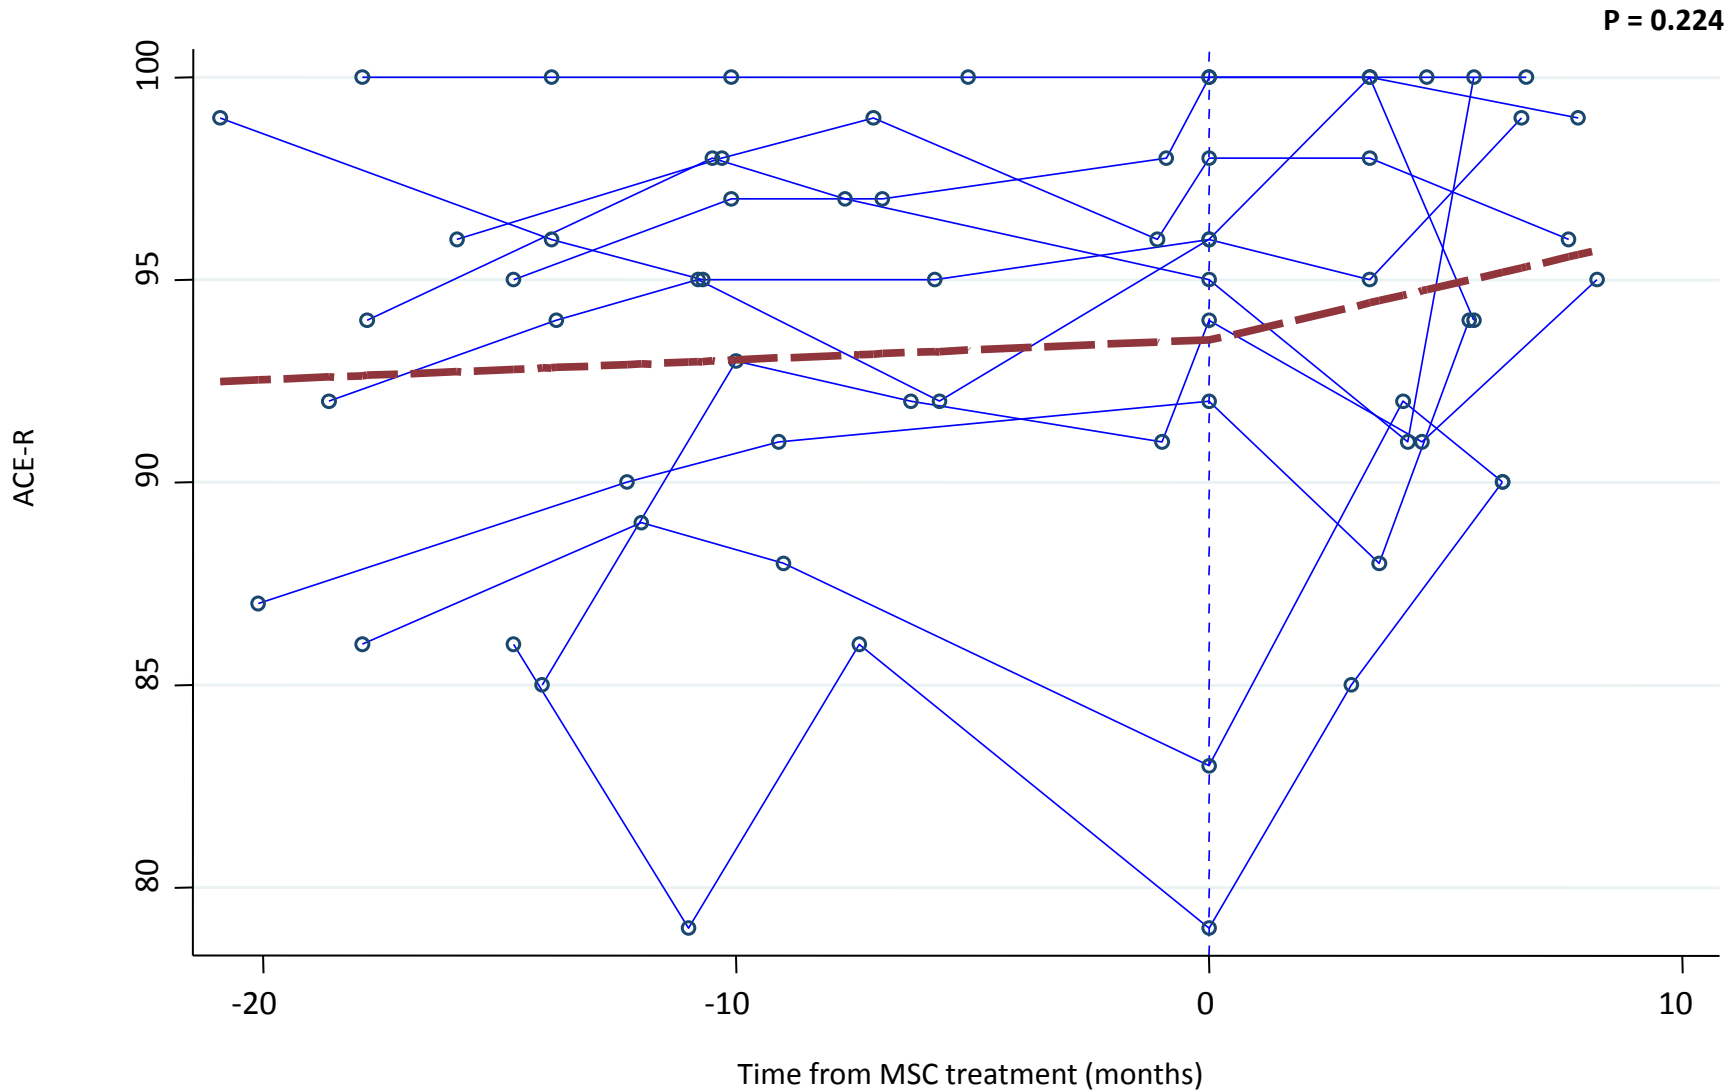

Change in Addenbrooke’s cognitive examination-revised score is shown for individual patients before and after treatment connected by solid lines. Pre- and post-treatment average rates of change are also shown connected in red dash. The significance test are shown is for a change in the gradient at the time of intervention.



Supplementary figure 2P: change in multiple sclerosis impact scale over time

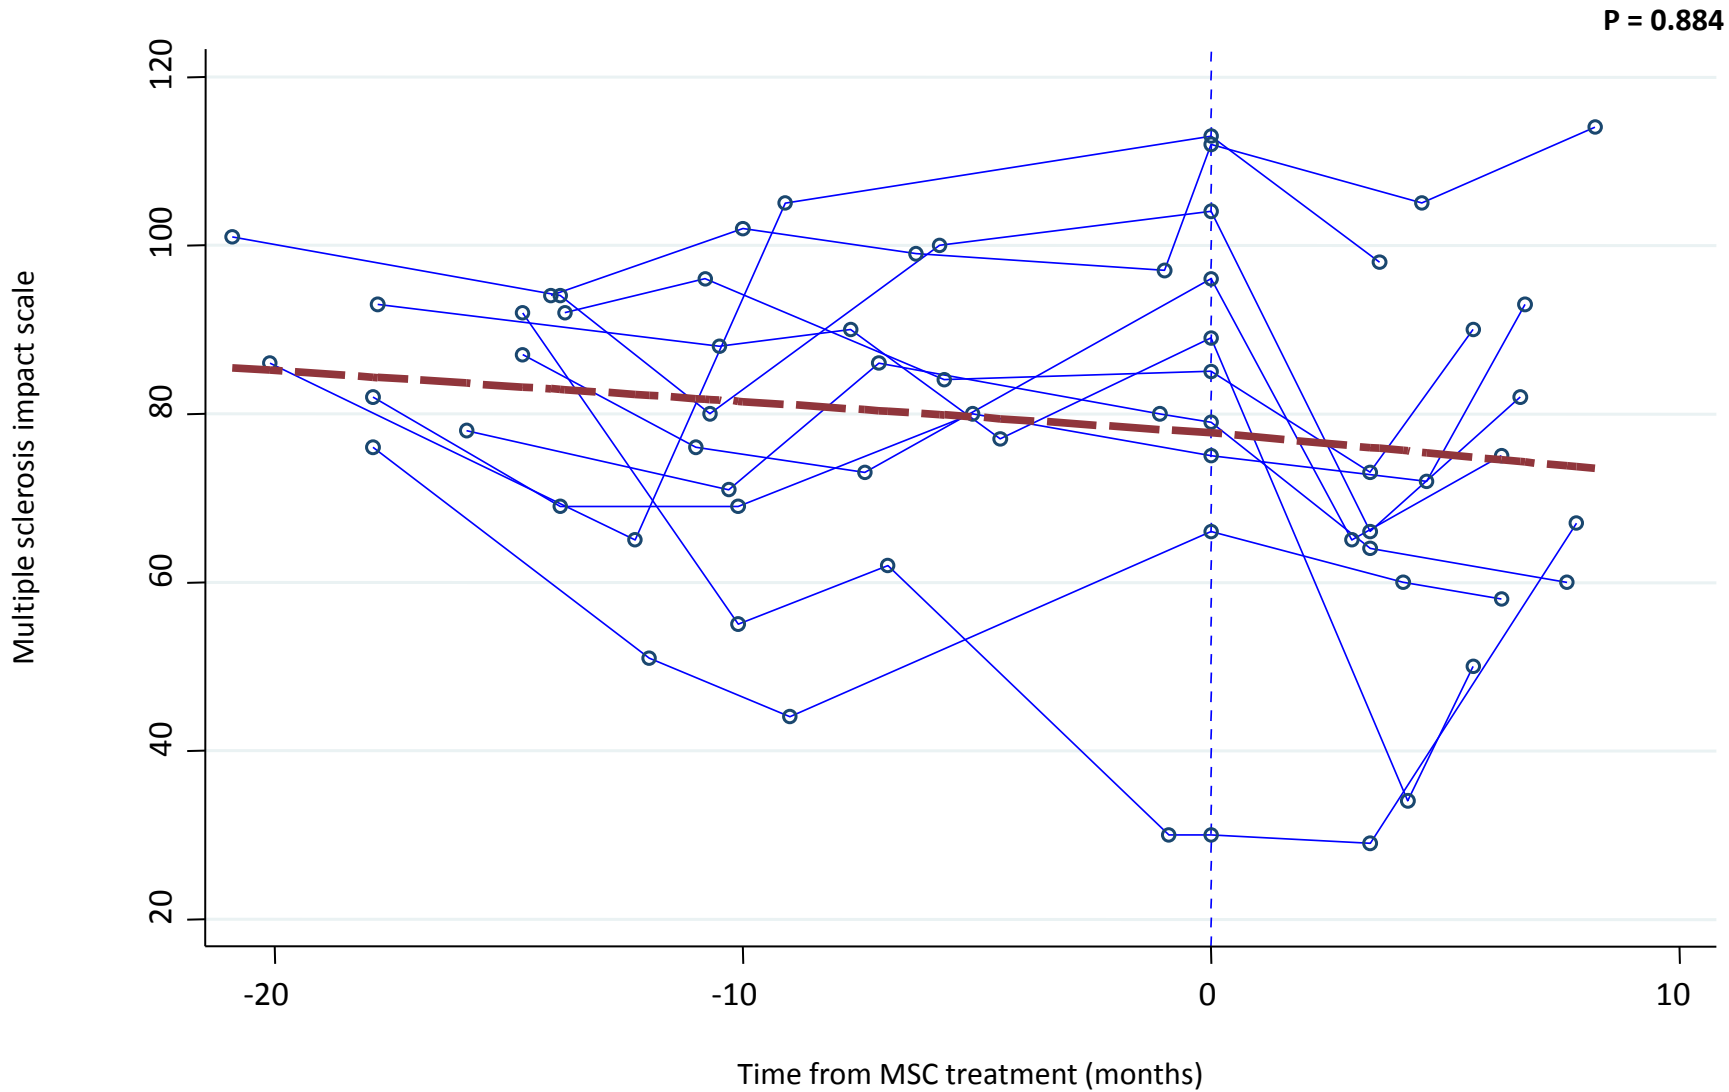

Change in 29-item multiple sclerosis impact scale is shown for individual patients before and after treatment connected by solid lines. Pre- and post-treatment average rates of change are also shown connected in red dash. The significance test are shown is for a change in the gradient at the time of intervention.

Change in Beck depression inventory II score is shown for individual patients before and after treatment connected by solid lines. Pre- and post-treatment average rates of change are also shown connected in red dash. The significance test are shown is for a change in the gradient at the time of intervention.

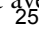

Supplementary figure 2R: change in total brain T1 hypointense lesion volume over time

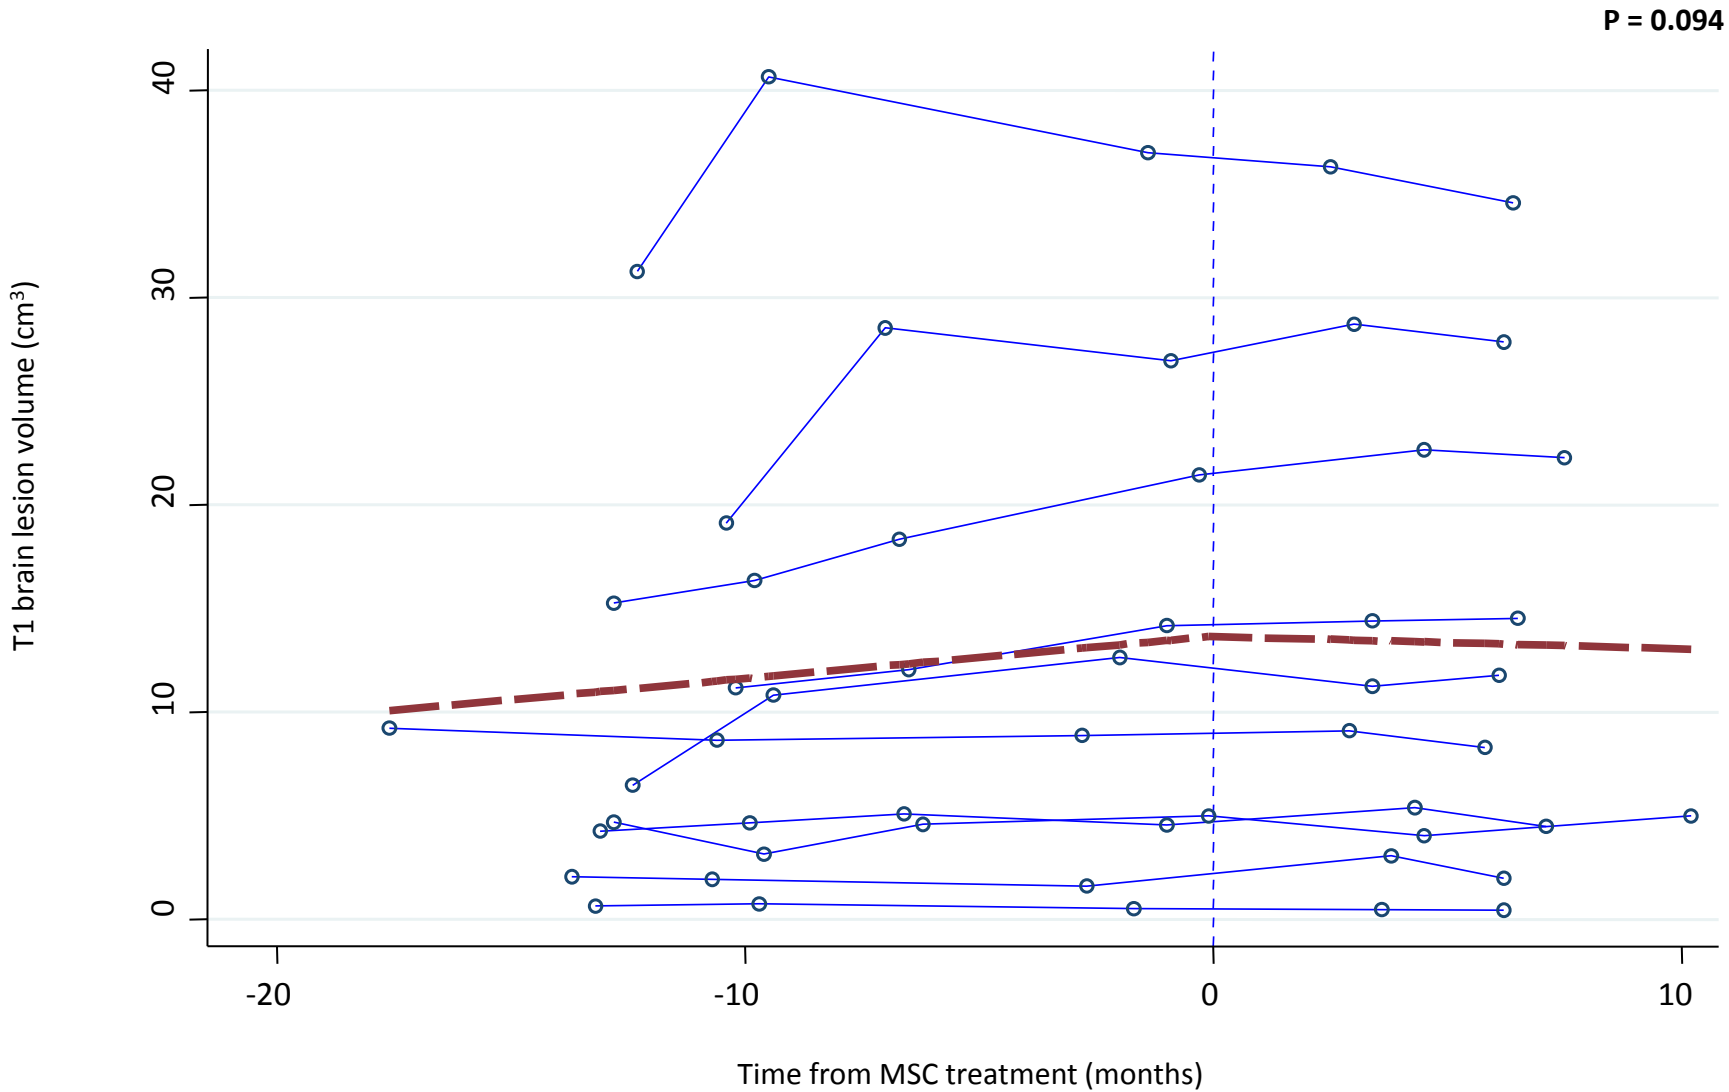

Change in T1 brain lesion volume is shown for individual patients before and after treatment connected by solid lines. Pre- and post-treatment average rates of change are also shown connected in red dash. The significance test are shown is for a change in the gradient at the time of intervention.

Supplementary figure 2S: change in total brain T1 hypointense lesion magnetization transfer ratio (MTR) over time

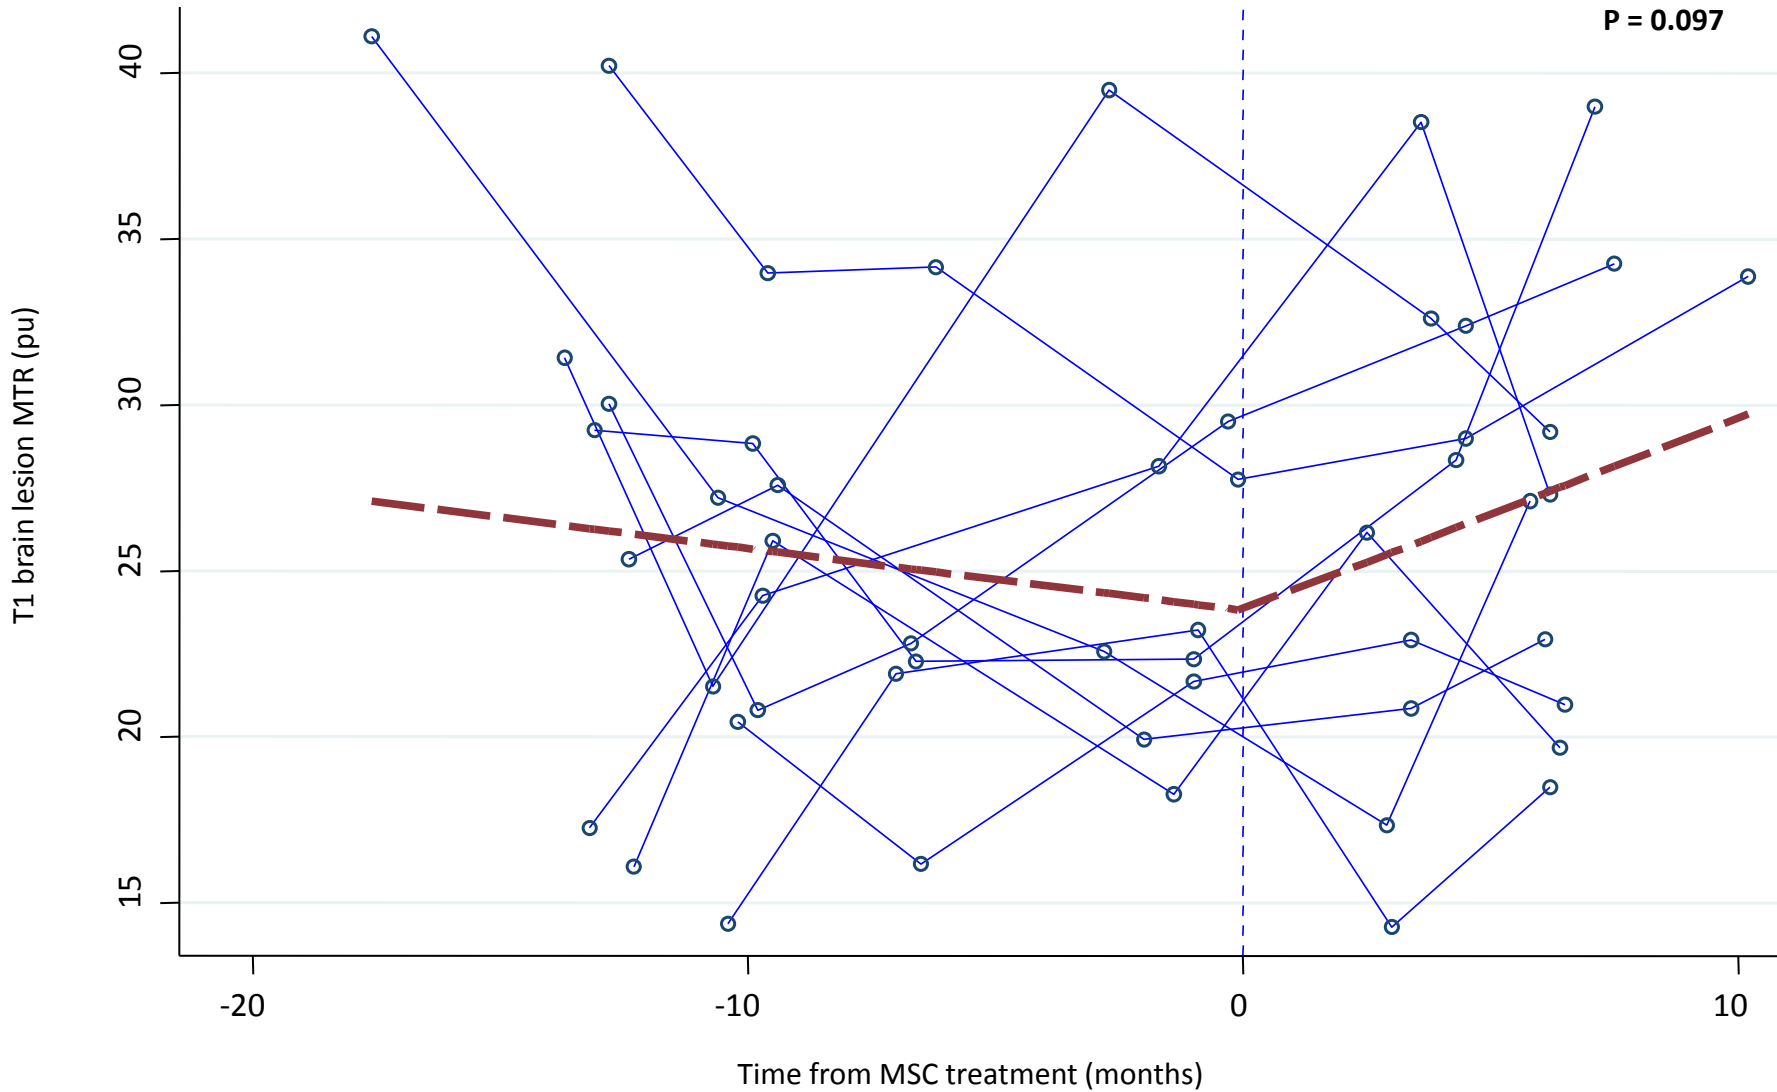

Change in T1 brain lesion magnetization transfer ratio is shown for individual patients before and after treatment connected by solid lines. Pre- and post-treatment average rates of change are also shown connected in red dash. The significance test are shown is for a change in the gradient at the time of intervention.

Supplementary figure 2T: change in total brain T2 intense lesion volume over time

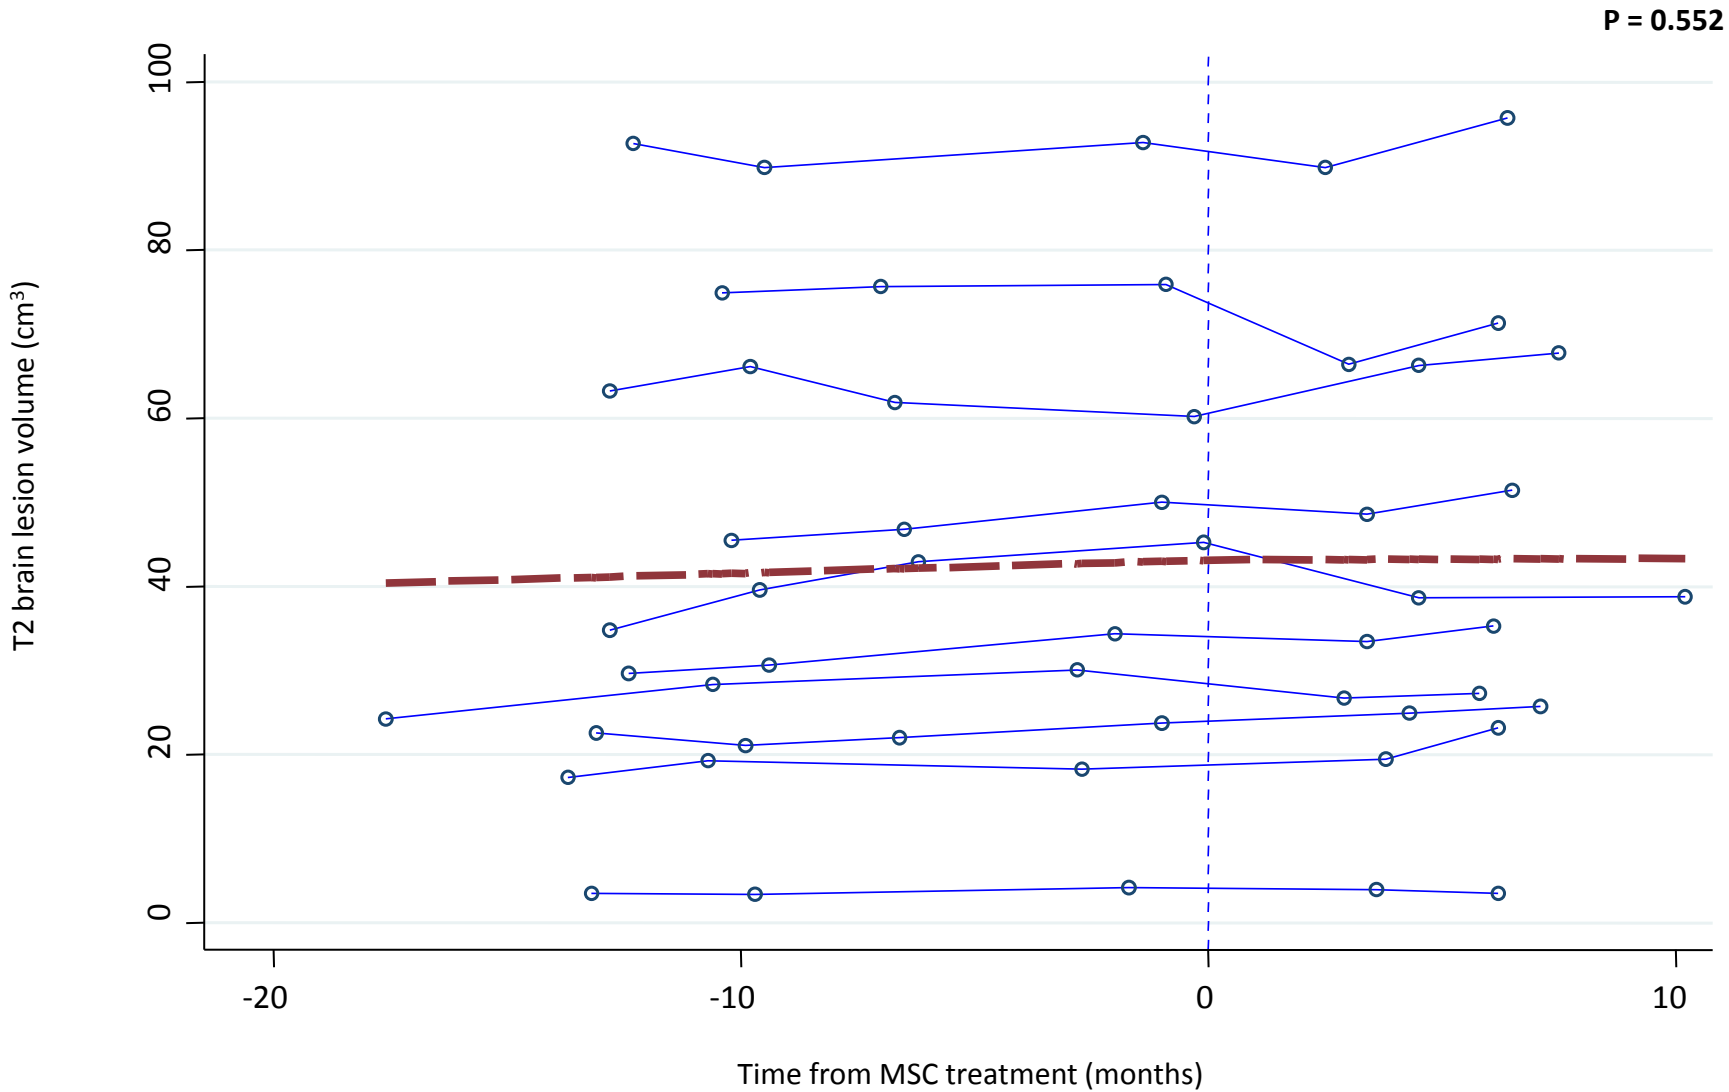

Change in T2 brain lesion volume is shown for individual patients before and after treatment connected by solid lines. Pre- and post-treatment average rates of change are also shown connected in red dash. The significance test are shown is for a change in the gradient at the time of intervention.

Supplementary figure 2U: change in total brain T2 intense lesion magnetization transfer ratio (MTR) over time

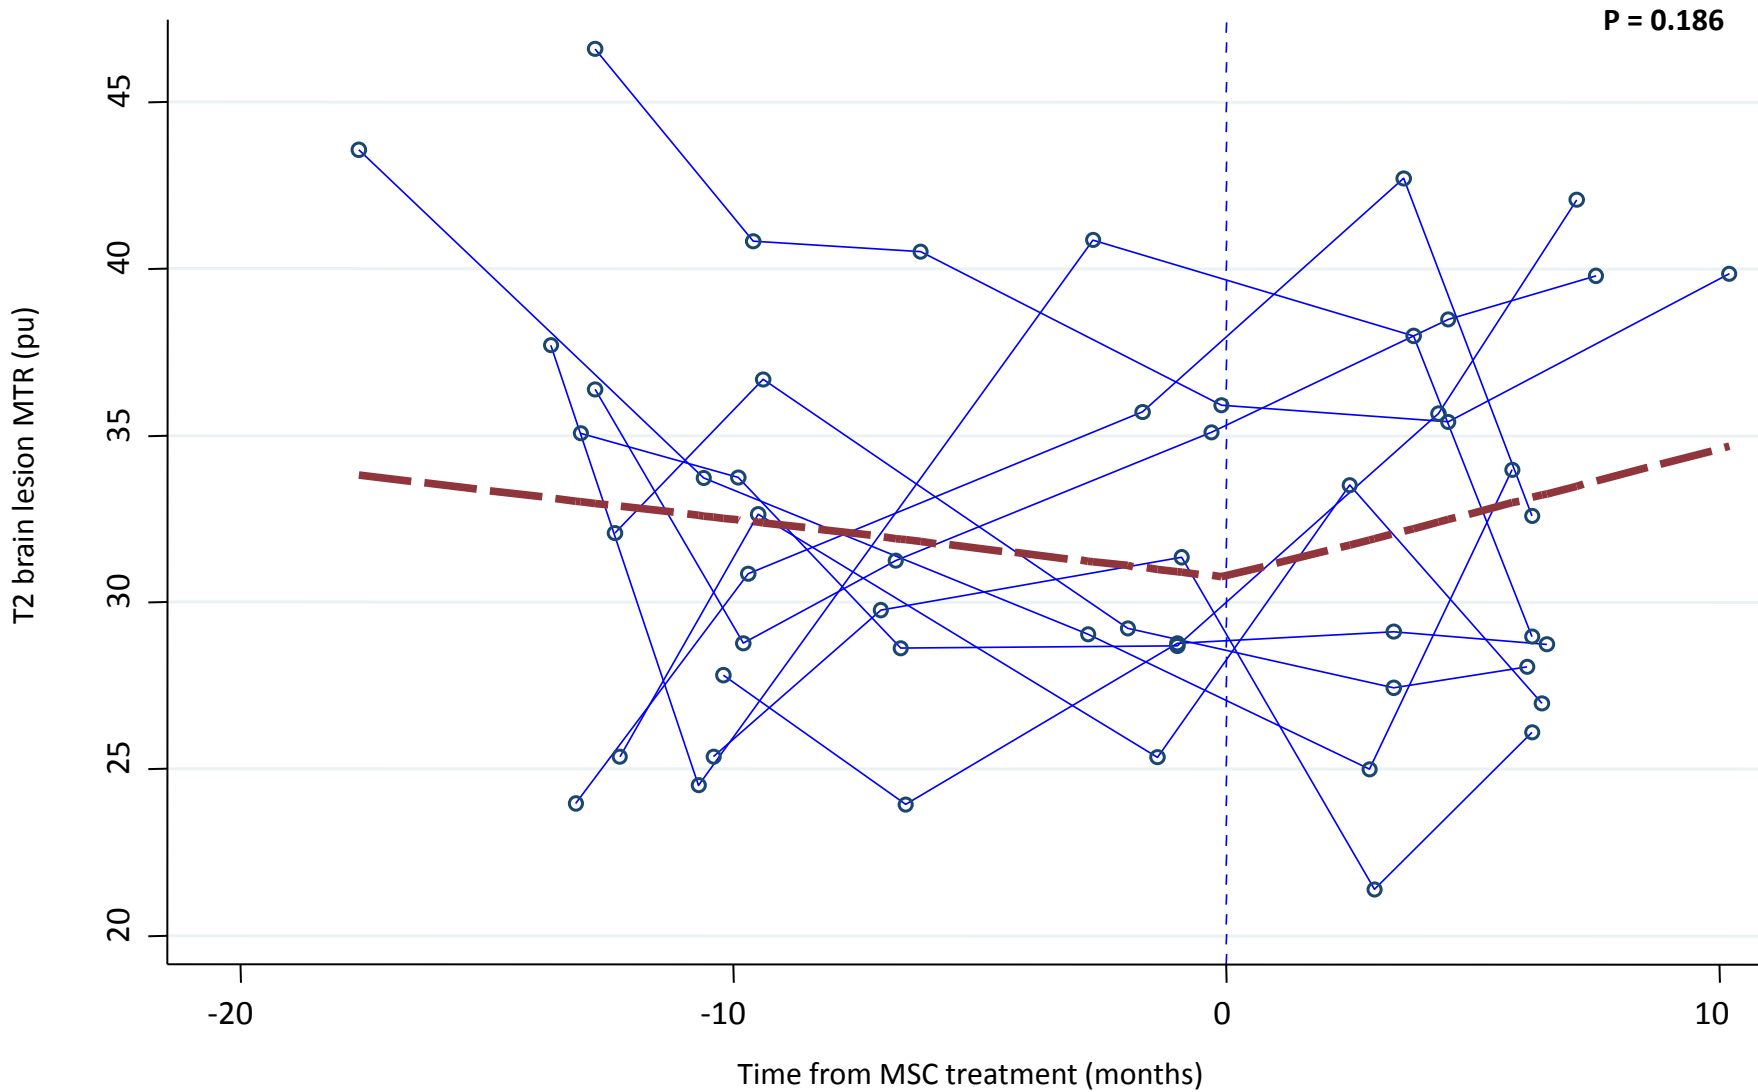

Change in T2 brain lesion magnetization transfer ratio is shown for individual patients before and after treatment connected by solid lines. Pre- and post-treatment average rates of change are also shown connected in red dash. The significance test are shown is for a change in the gradient at the time of intervention.
